# Supplementary material for: Bioinformatics Screen Reveals Gli-Mediated Hedgehog Signaling as an Associated Pathway to Poor Immune Infiltration of Dedifferentiated Liposarcoma
Source: MDPI journal article supplement (doi:10.3390/cancers15133360), 2023-06-27

**Supplemental Table S1:** Gene Ontology of Genes enriched in adipose progenitors and DDLPS

| Gene Sets | Enrichment FDR | nGenes | Pathway Genes | Fold Enrichment | Pathways                                                     |
|-----------|----------------|--------|---------------|-----------------|--------------------------------------------------------------|
| KEGG      | 1.40E-03       | 9      | 39            | 5.9             | Various types of N-glycan biosynthesis                       |
|           | 1.60E-14       | 36     | 169           | 5.5             | Protein processing in endoplasmic reticulum                  |
|           | 1.40E-03       | 10     | 50            | 5.1             | N-Glycan biosynthesis                                        |
|           | 3.20E-03       | 10     | 56            | 4.6             | Hedgehog signaling pathway                                   |
|           | 3.30E-02       | 11     | 93            | 3               | TGF-beta signaling pathway                                   |
|           | 1.40E-03       | 19     | 161           | 3               | MicroRNAs in cancer                                          |
|           | 5.70E-03       | 16     | 141           | 2.9             | Ubiquitin mediated proteolysis                               |
|           | 3.30E-02       | 13     | 121           | 2.7             | Thyroid hormone signaling pathway                            |
|           | 5.70E-03       | 20     | 202           | 2.5             | Proteoglycans in cancer                                      |
|           | 3.80E-02       | 14     | 143           | 2.5             | Signaling pathways regulating pluripotency of stem cells     |
|           |                |        |               |                 |                                                              |
| GO_BP     | 3.70E-08       | 24     | 121           | 5.1             | Collagen fibril organization                                 |
|           | 1.40E-09       | 53     | 450           | 3               | Extracellular matrix organization                            |
|           | 1.40E-09       | 53     | 451           | 3               | Extracellular structure organization                         |
|           | 1.40E-09       | 53     | 454           | 3               | External encapsulating structure organization                |
|           | 1.80E-15       | 125    | 1368          | 2.3             | Peptidyl-amino acid modification                             |
|           | 4.10E-08       | 89     | 1102          | 2.1             | Embryo development                                           |
|           | 1.40E-09       | 124    | 1649          | 1.9             | Plasma membrane bounded cell projection organization         |
|           | 4.10E-08       | 109    | 1473          | 1.9             | Neuron differentiation                                       |
|           | 2.40E-09       | 125    | 1690          | 1.9             | Cell projection organization                                 |
|           | 4.10E-08       | 129    | 1857          | 1.8             | Intracellular transport                                      |
| Panther   | 3.40E-02       | 7      | 43            | 4.2             | P00060 Ubiquitin proteasome pathway                          |
|           | 6.10E-03       | 11     | 75            | 3.8             | P00059 p53 pathway                                           |
|           | 4.20E-03       | 13     | 91            | 3.7             | P00052 TGF-beta signaling pathway                            |
|           | 4.10E-02       | 22     | 286           | 2               | P00057 Wnt signaling pathway                                 |
|           |                |        |               |                 |                                                              |
| Reactome  | 1.80E-09       | 19     | 67            | 7.3             | Collagen biosynthesis and modifying enzymes                  |
|           | 1.40E-09       | 22     | 90            | 6.3             | Collagen formation                                           |
|           | 6.20E-05       | 13     | 61            | 5.5             | Assembly of collagen fibrils and other multimeric structures |
|           | 3.10E-05       | 20     | 133           | 3.8             | Golgi-to-ER retrograde transport                             |
|           | 6.70E-06       | 23     | 154           | 3.8             | ER to Golgi Anterograde Transport                            |
|           | 4.20E-11       | 44     | 305           | 3.7             | Asparagine N-linked glycosylation                            |
|           | 3.80E-06       | 26     | 185           | 3.6             | Transport to the Golgi and subsequent modification           |

|                 |          |     |      |     |                                                |
|-----------------|----------|-----|------|-----|------------------------------------------------|
|                 | 1.60E-05 | 26  | 203  | 3.3 | Intra-Golgi and retrograde Golgi-to-ER traffic |
|                 | 1.20E-05 | 41  | 418  | 2.5 | Extracellular matrix organization              |
|                 | 3.70E-17 | 136 | 1516 | 2.3 | Post-translational protein modification        |
|                 |          |     |      |     |                                                |
| Hallmark MSigDB | 1.30E-29 | 55  | 200  | 7   | HALLMARK EPITHELIAL MESENCHYMAL TRANSITION     |
|                 | 1.30E-03 | 9   | 54   | 4.3 | HALLMARK TGF BETA SIGNALING                    |
|                 | 3.30E-06 | 18  | 112  | 4.1 | HALLMARK UNFOLDED PROTEIN RESPONSE             |
|                 | 2.20E-08 | 29  | 198  | 3.7 | HALLMARK G2M CHECKPOINT                        |
|                 | 7.10E-08 | 28  | 199  | 3.6 | HALLMARK MYC TARGETS V1                        |
|                 | 2.50E-07 | 27  | 200  | 3.5 | HALLMARK E2F TARGETS                           |
|                 | 1.70E-03 | 12  | 96   | 3.2 | HALLMARK PROTEIN SECRETION                     |
|                 | 2.60E-05 | 23  | 198  | 3   | HALLMARK GLYCOLYSIS                            |
|                 | 2.50E-04 | 21  | 199  | 2.7 | HALLMARK MTORC1 SIGNALING                      |
|                 | 1.70E-03 | 19  | 200  | 2.4 | HALLMARK HYPOXIA                               |



**Supplemental Table S2:** Gene Ontology of Genes enriched in adipocytes and WDLPS

| Gene Sets | Enrichment FDR | nGenes | Pathway Genes | Fold Enrichment | Pathways                                                         |
|-----------|----------------|--------|---------------|-----------------|------------------------------------------------------------------|
| KEGG      | 2.90E-13       | 15     | 32            | 15.3            | Propanoate metabolism                                            |
|           | 8.20E-16       | 19     | 43            | 14.4            | Fatty acid degradation                                           |
|           | 4.20E-11       | 13     | 30            | 14.2            | Citrate cycle (TCA cycle)                                        |
|           | 1.10E-13       | 18     | 48            | 12.2            | Valine, leucine and isoleucine degradation                       |
|           | 1.00E-11       | 16     | 47            | 11.1            | Pyruvate metabolism                                              |
|           | 1.70E-12       | 18     | 57            | 10.3            | Fatty acid metabolism                                            |
|           | 4.00E-14       | 22     | 75            | 9.6             | PPAR signaling pathway                                           |
|           | 3.80E-13       | 25     | 115           | 7.1             | Carbon metabolism                                                |
|           | 1.70E-13       | 26     | 120           | 7.1             | AMPK signaling pathway                                           |
|           | 1.70E-35       | 149    | 1527          | 3.2             | Metabolic pathways                                               |
|           |                |        |               |                 |                                                                  |
| GO_BP     | 3.40E-25       | 53     | 266           | 6.5             | Carboxylic acid catabolic proc.                                  |
|           | 3.30E-34       | 76     | 414           | 6               | Fatty acid metabolic proc.                                       |
|           | 1.30E-43       | 108    | 675           | 5.2             | Monocarboxylic acid metabolic proc.                              |
|           | 5.50E-30       | 83     | 571           | 4.7             | Generation of precursor metabolites and energy                   |
|           | 7.50E-44       | 138    | 1102          | 4.1             | Carboxylic acid metabolic proc.                                  |
|           | 2.30E-43       | 139    | 1135          | 4               | Oxoacid metabolic proc.                                          |
|           | 3.30E-34       | 128    | 1178          | 3.5             | Cellular lipid metabolic proc.                                   |
|           | 1.40E-39       | 158    | 1555          | 3.3             | Lipid metabolic proc.                                            |
|           |                |        |               |                 |                                                                  |
| Panther   | 1.50E-04       | 5      | 10            | 16.3            | P00051 TCA cycle                                                 |
|           | 1.50E-04       | 5      | 10            | 16.3            | P02772 Pyruvate metabolism                                       |
|           | 1.70E-05       | 7      | 16            | 14.3            | P04372 5-Hydroxytryptamine degradation                           |
|           | 1.10E-02       | 3      | 8             | 12.2            | P02762 Pentose phosphate pathway                                 |
|           | 1.10E-03       | 7      | 35            | 6.5             | P00033 Insulin/IGF pathway–protein kinase B signaling cascade    |
|           | 1.10E-03       | 8      | 47            | 5.6             | P00048 PI3 kinase pathway                                        |
|           | 2.00E-04       | 14     | 114           | 4               | P00018 EGF receptor signaling pathway                            |
|           | 1.10E-02       | 10     | 103           | 3.2             | P00021 FGF signaling pathway                                     |
|           | 1.50E-03       | 15     | 161           | 3               | P00034 Integrin signaling pathway                                |
|           | 2.20E-03       | 15     | 169           | 2.9             | P06959 CCKR signaling map                                        |
|           |                |        |               |                 |                                                                  |
| Reactome  | 8.30E-07       | 7      | 11            | 20.8            | Mitochondrial fatty acid beta-oxidation of saturated fatty acids |
|           | 3.40E-10       | 14     | 37            | 12.4            | Mitochondrial Fatty Acid Beta-Oxidation                          |
|           | 1.30E-07       | 11     | 31            | 11.6            | Pyruvate metabolism                                              |
|           | 9.90E-11       | 17     | 55            | 10.1            | Pyruvate metabolism and Citric Acid TCA cycle                    |
|           | 4.80E-08       | 13     | 43            | 9.9             | Signaling by Retinoic Acid                                       |
|           | 3.50E-21       | 41     | 183           | 7.3             | Fatty acid metabolism                                            |
|           | 8.90E-14       | 34     | 197           | 5.6             | Metabolism of vitamins and cofactors                             |
|           | 1.30E-07       | 20     | 123           | 5.3             | Metabolism of water-soluble vitamins and cofactors               |

|                 |          |    |     |      |                                                              |
|-----------------|----------|----|-----|------|--------------------------------------------------------------|
|                 | 2.60E-10 | 28 | 178 | 5.1  | The citric acid TCA cycle and respiratory electron transport |
|                 | 2.10E-27 | 94 | 783 | 3.9  | Metabolism of lipids                                         |
|                 |          |    |     |      |                                                              |
| Hallmark MSigDB | 5.20E-75 | 86 | 199 | 14.1 | HALLMARK ADIPOGENESIS                                        |
|                 | 4.30E-33 | 48 | 158 | 9.9  | HALLMARK FATTY ACID METABOLISM                               |
|                 | 4.90E-26 | 46 | 200 | 7.5  | HALLMARK OXIDATIVE PHOSPHORYLATION                           |
|                 | 1.40E-10 | 21 | 112 | 6.1  | HALLMARK BILE ACID METABOLISM                                |
|                 | 1.20E-17 | 37 | 200 | 6    | HALLMARK XENOBIOTIC METABOLISM                               |
|                 | 1.70E-09 | 19 | 104 | 6    | HALLMARK PEROXISOME                                          |
|                 | 1.60E-13 | 32 | 200 | 5.2  | HALLMARK MYOGENESIS                                          |
|                 | 8.50E-13 | 31 | 200 | 5.1  | HALLMARK ESTROGEN RESPONSE LATE                              |
|                 | 4.40E-12 | 30 | 200 | 4.9  | HALLMARK HYPOXIA                                             |
|                 | 2.20E-11 | 29 | 200 | 4.7  | HALLMARK ESTROGEN RESPONSE EARLY                             |

**Supplemental Figure S2:** Genomics Analysis of Gli1 amplification in two independent DDLPS patient cohorts. (A) Amplification status of CDK4, MDM2, Gli1 with subsequent mutual exclusivity tests in TCGA-SARC DDLPS tumors and (B) GSE21124 DDLPS tumors. (C) Gene expression of Gli1 relative to CDK4 and MDM2 genomic status in DDLPS tumors from (C) TCGA-SARC cohort and (D) GSE21124 cohort. (n.s.: not significant, \*p<0.05)

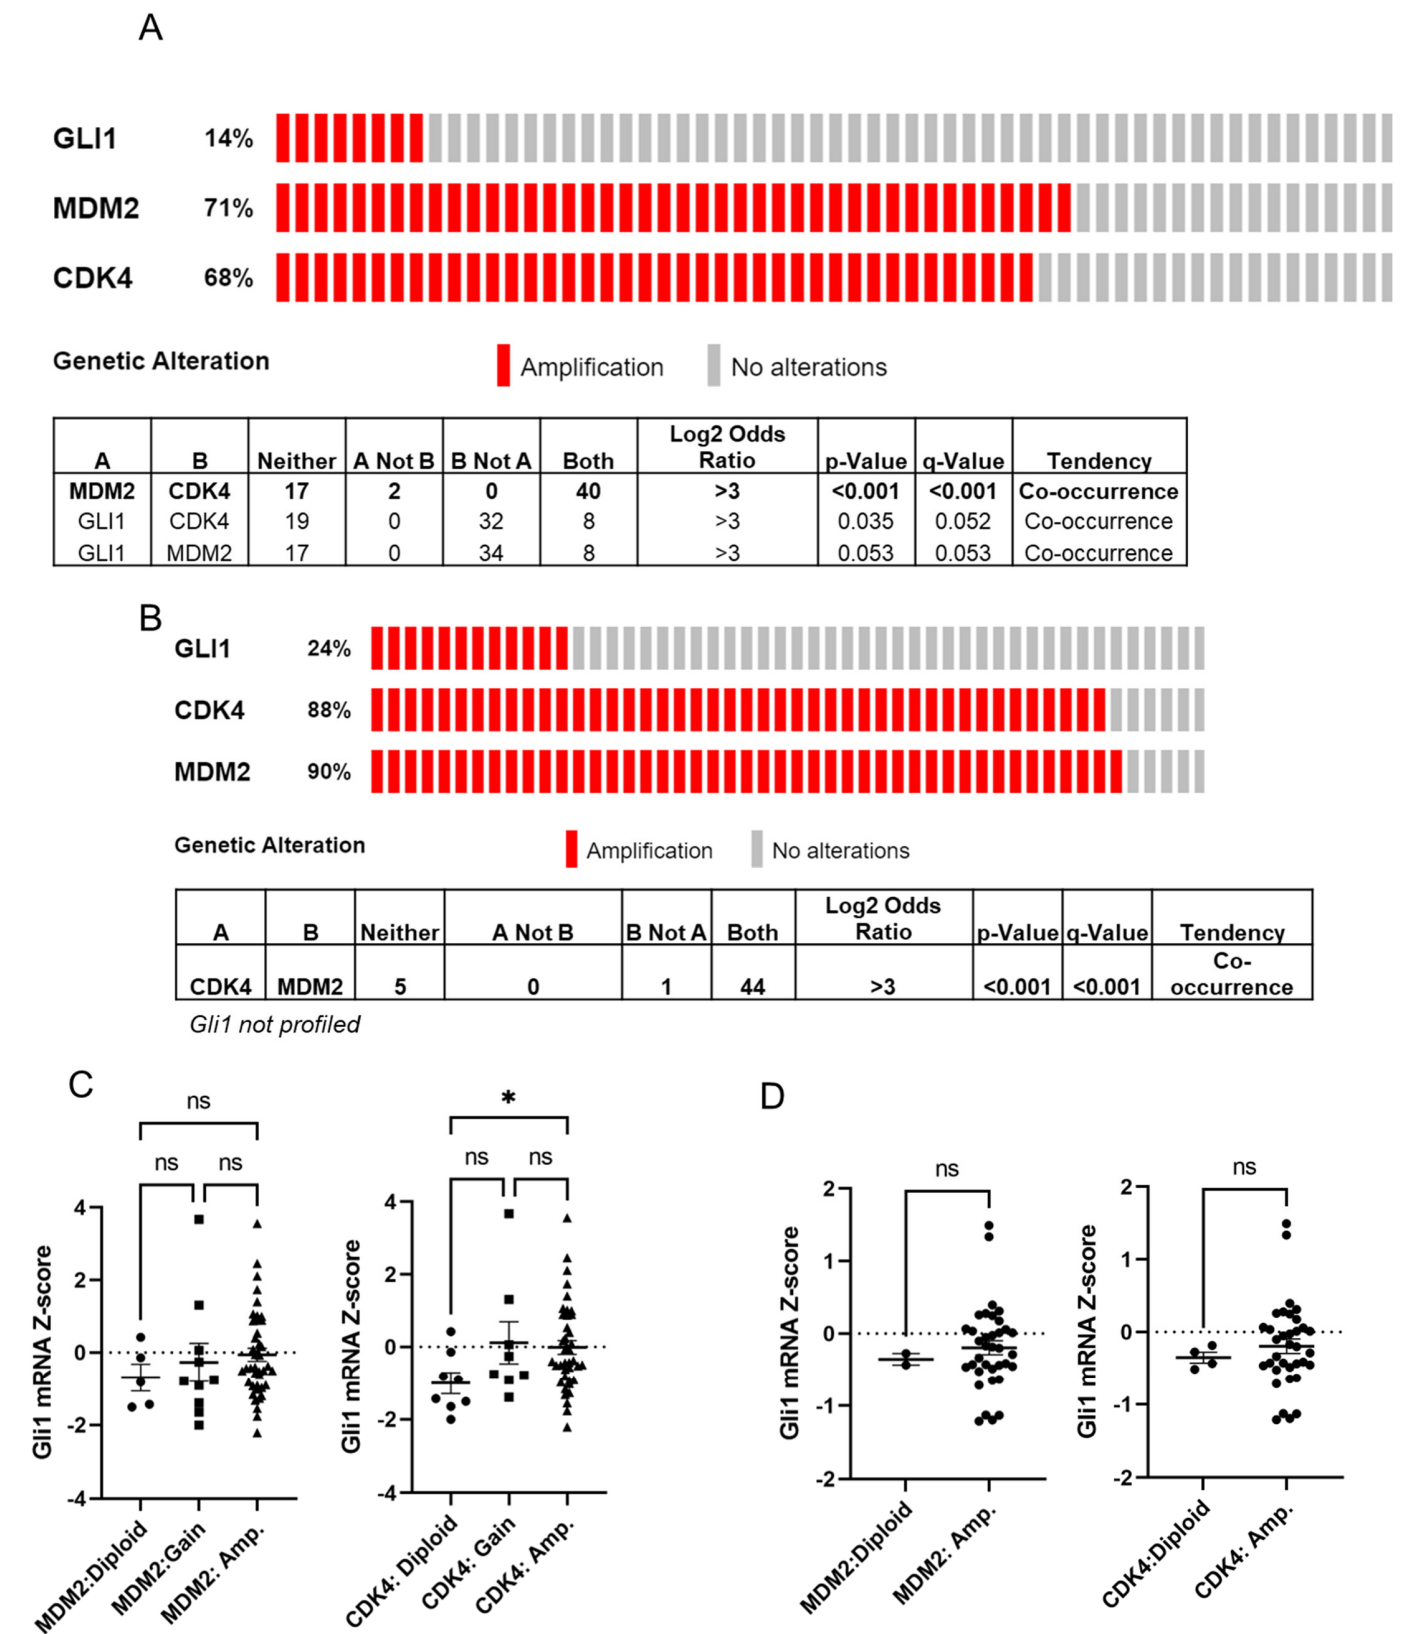

**Supplemental Figure S3:** Gene Set Enrichment Analysis validation Gene Sets. GSEA was performed to evaluate hedgehog signaling enrichment between DDLPS and WDLPS tumors from the GSE30929 cohort. Adipokine signaling and adipogenesis gene sets were used for validation of WDLPS tumoral expression.

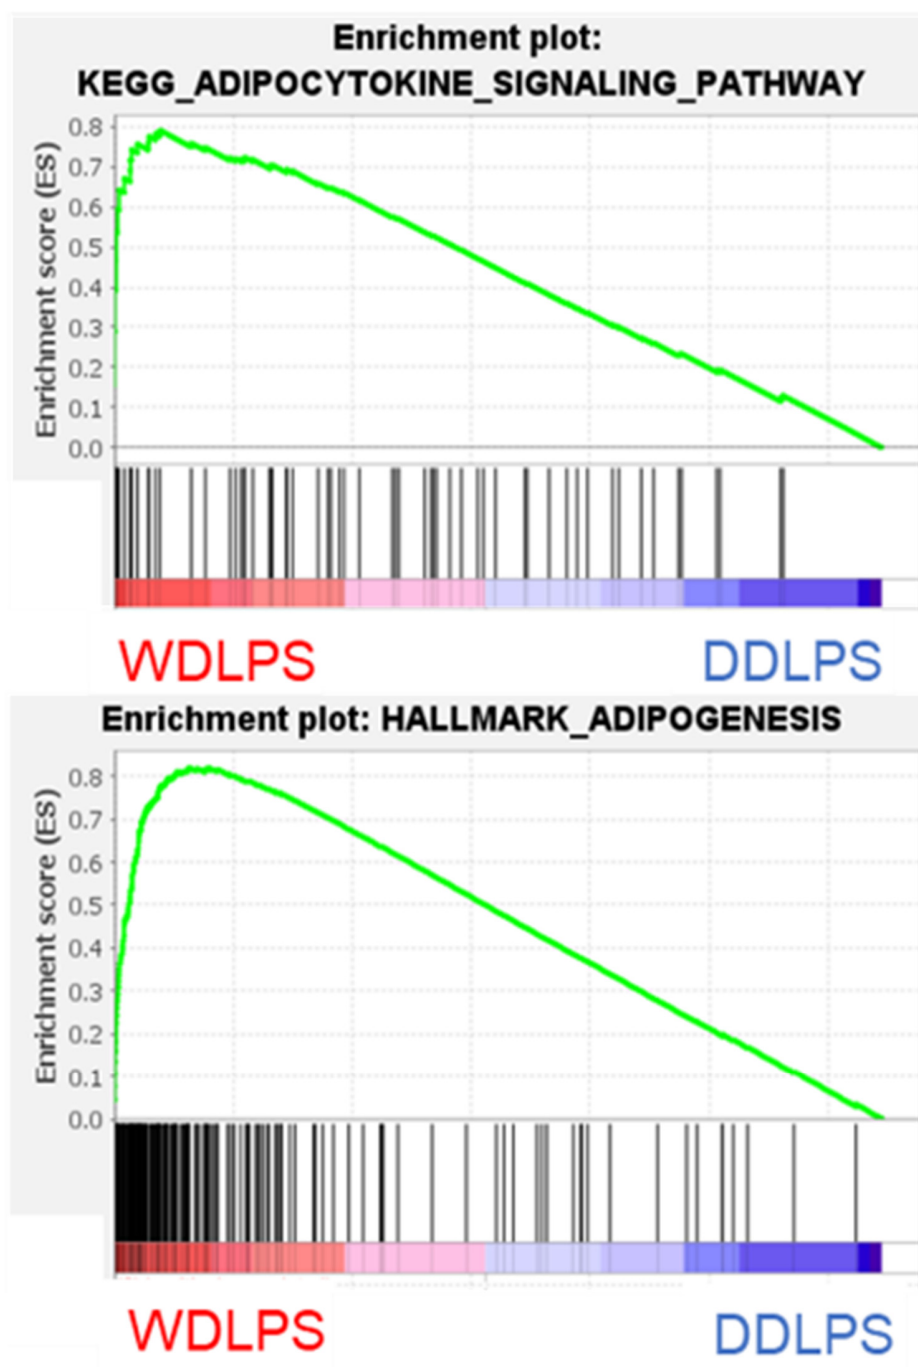

**Supplemental Figure S4:** Gli2 is enriched in mesenchymal adipose progenitors and absent from immune populations and mature adipocytes in adipose tissue. Gli2 expression data in normal subcutaneous adipose tissues were evaluated using the human protein atlas (A). Gli2 expression decreased during adipocyte differentiation (GSE20752) (B). Whole tissue sequencing co-expression analysis experimental outline (C). Quantification of Gli2 enrichment score based on cell marker expression in subcutaneous adipose tissue (D). Single cell RNA sequencing distribution of Gli2 expression (E). Cell population cluster expression of Gli2 shown in E (F). (n.s.: not significant\*\*p<0.01, \*\*\*p<0.001)

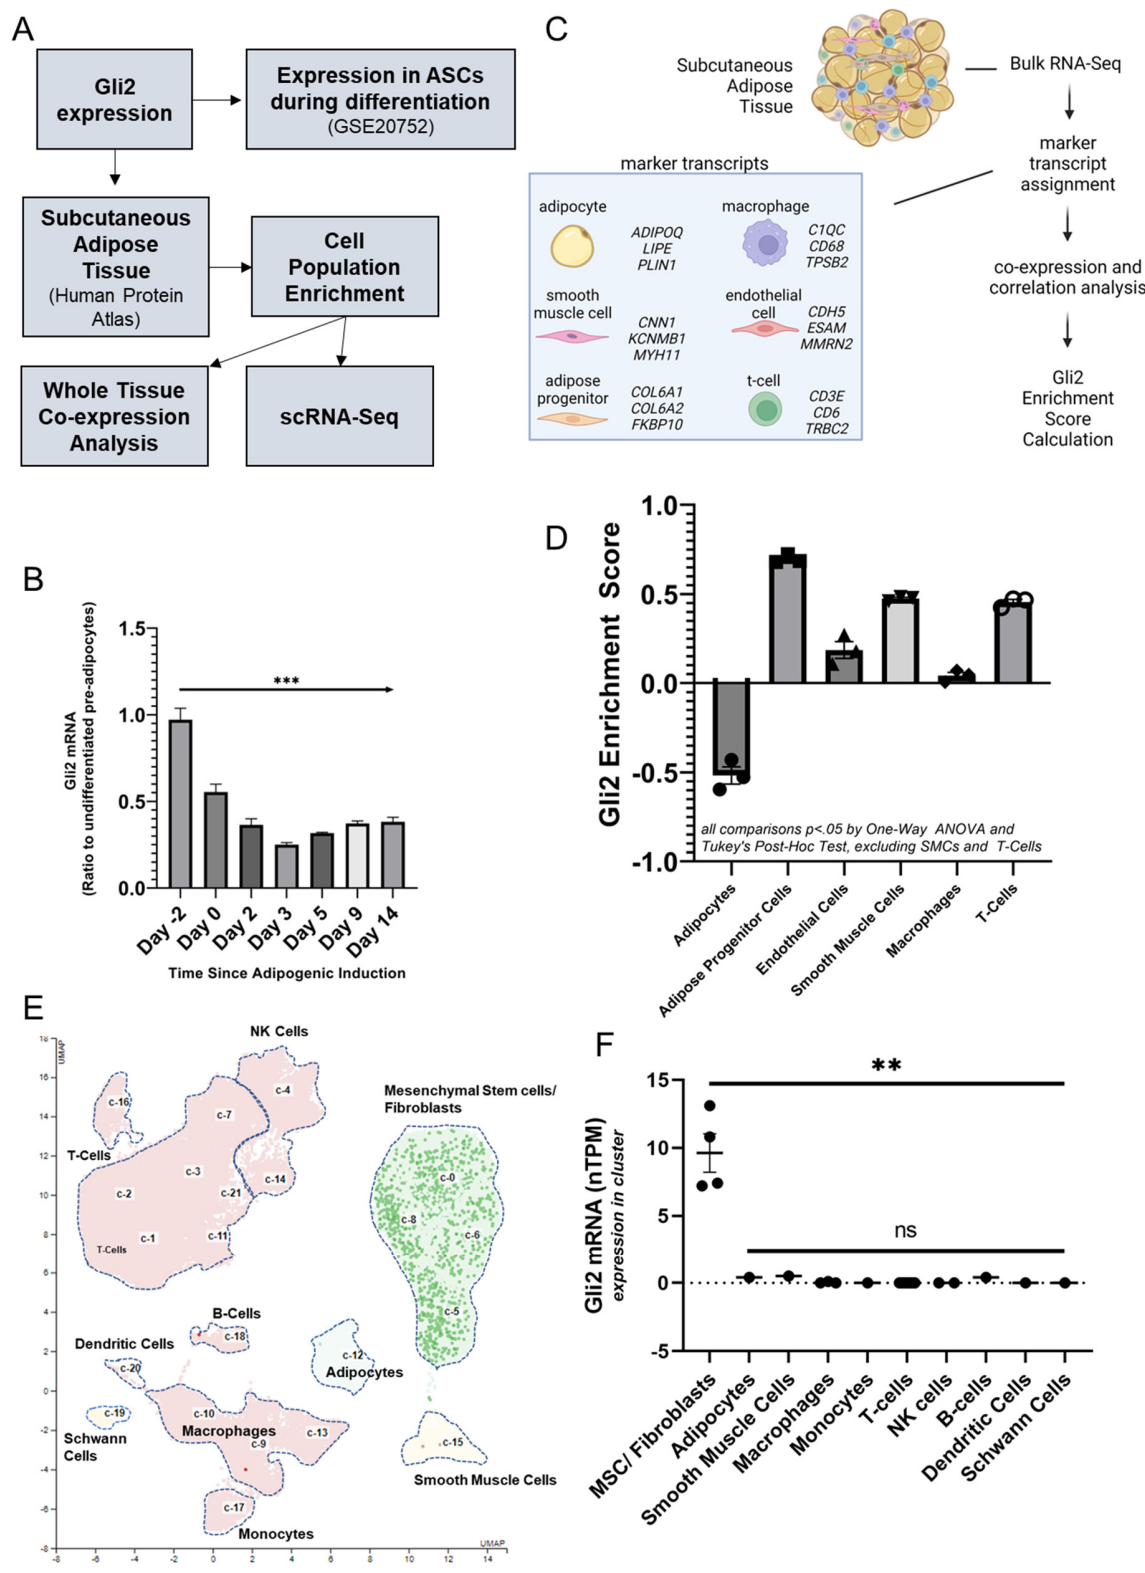



**Supplemental Figure S5:** Gene Ontology of genes clustered with Gli2 expression during bulk tissue RNA-seq from the human protein atlas. Gli2 clustered with 335 genes, with high confidence, associated with fibroblasts across catalogued tissues. These genes were associated with transcriptional regulation, embryonic development, mesenchymal differentiation, and stem cell population maintenance. (MF: molecular function, CC: cellular component, BP: biological process)

Clustering Methods: [https://www.proteinatlas.org/about/assays+annotation#gene\\_clustering\\_rna](https://www.proteinatlas.org/about/assays+annotation#gene_clustering_rna)

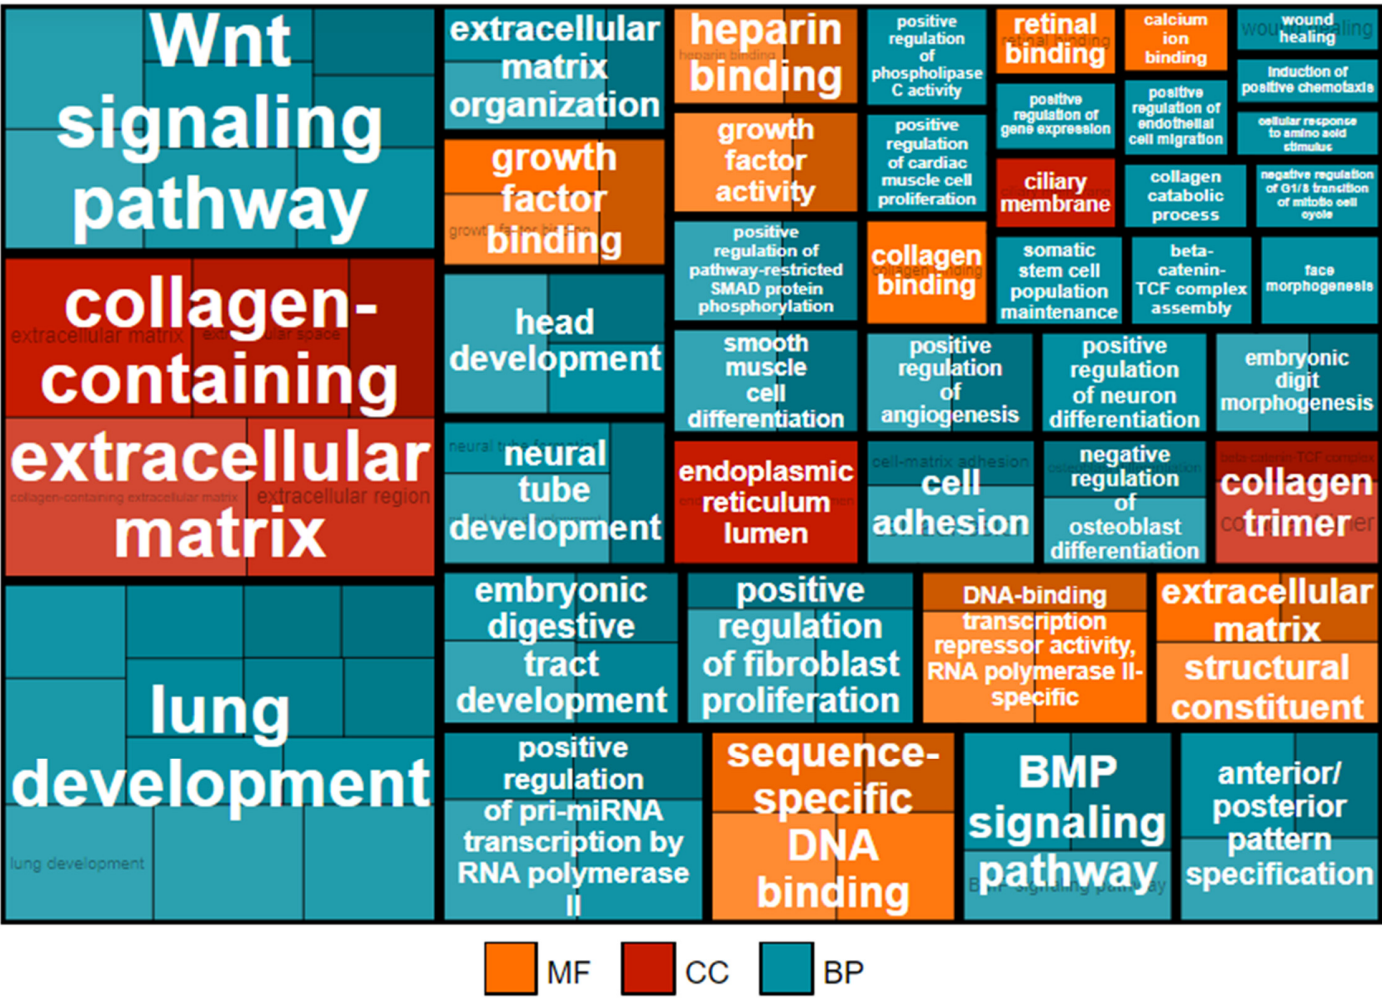

**Supplemental Figure S6:** Gene Ontology of genes clustered with Gli2 expression during single cell RNA-sequencing form human protein atlas. Gli2 clustered with 187 genes within Connective Tissue Cells, specifically ECM organization. (MF: molecular function, CC: cellular component, BP: biological process). Genes were functionally associated with mesenchymal differentiation, ECM development and organization, wound healing, and morphogenesis.

Clustering Methods: [https://www.proteinatlas.org/about/assays+annotation#gene\\_clustering\\_rna](https://www.proteinatlas.org/about/assays+annotation#gene_clustering_rna)

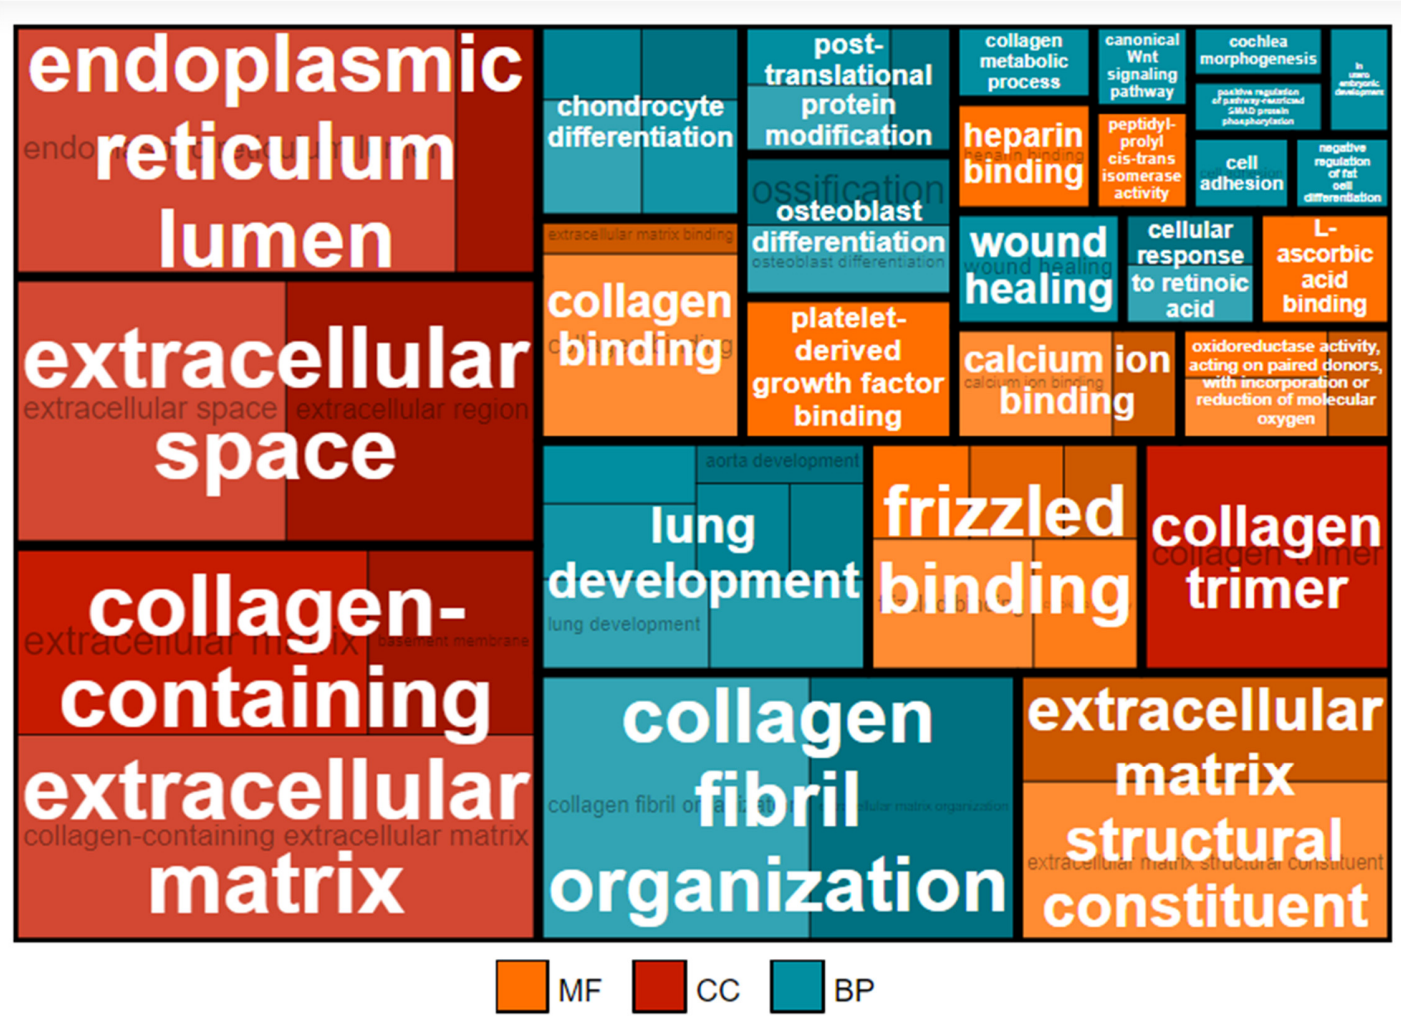

**Supplemental Figure S7:** Co-expressed Genes were evaluated across three independent DDLPS experimental cohorts. Genes with Spearman’s  $R > +0.5$  (A). Genes with Spearman’s  $R < -0.5$  (B). Heatmap plot of correlation distribution across 3 cohorts of overlapping correlated genes (C). (MSKCC\_2012: GSE21124)

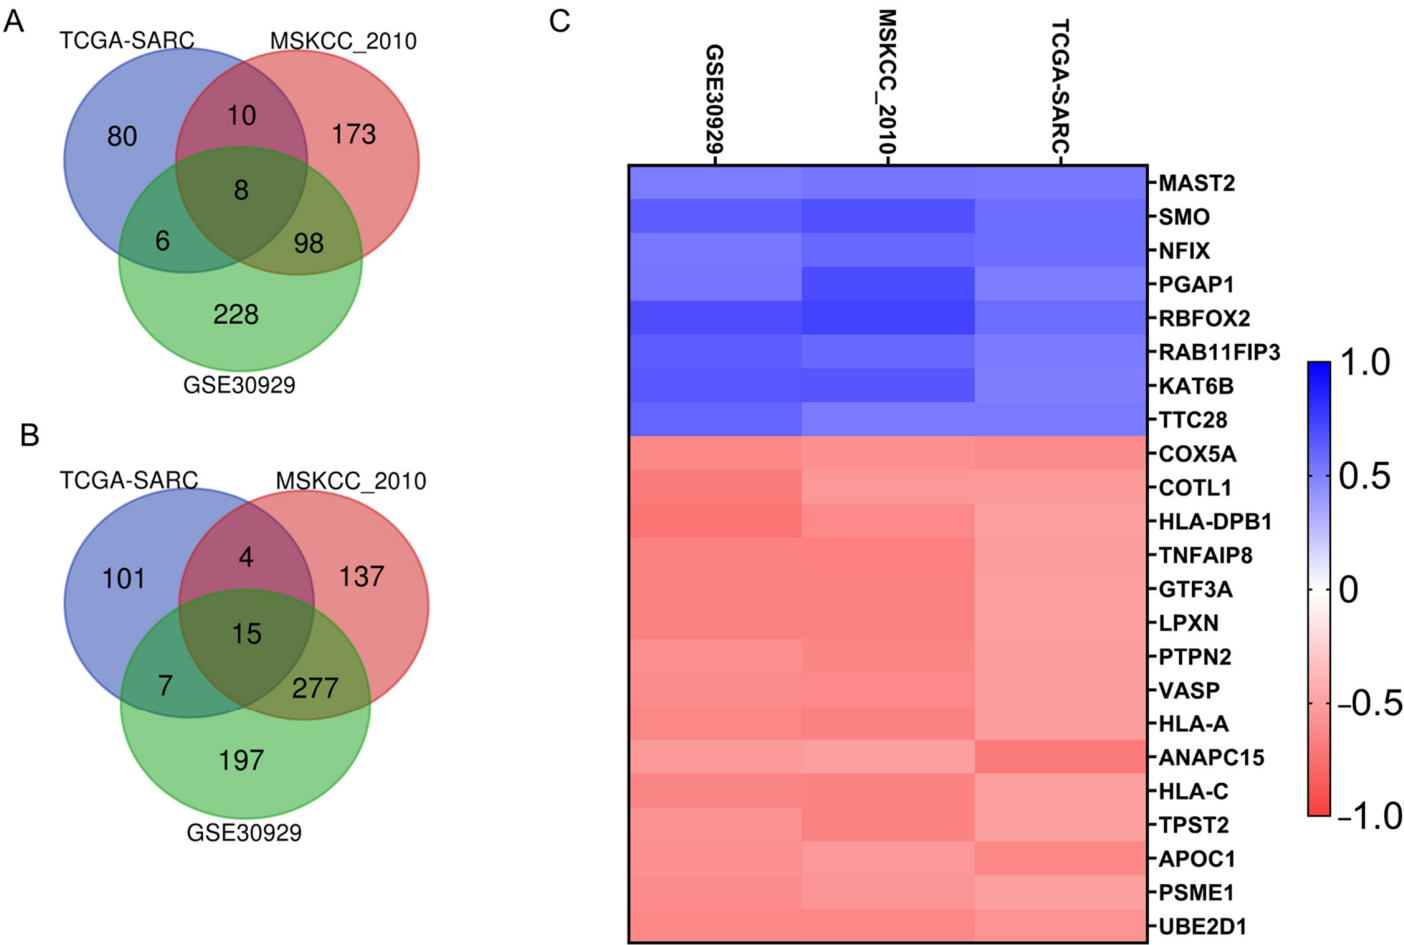

Supplement: s1 [file s1]
