# Supplementary material for: Bioinformatics Screen Reveals Gli-Mediated Hedgehog Signaling as an Associated Pathway to Poor Immune Infiltration of Dedifferentiated Liposarcoma
Source: MDPI journal article supplement (doi:10.3390/cancers15133360), 2023-06-27
Supplement: s1 [file s1]

**Table S3:** DDLPS (n=40) Tumor Samples used in analyses from GSE30929 cohort

Whole-Transcript Expression Data for Liposarcoma (HG-U133A array)

Gobble RM, Qin LX, Brill ER, Angeles CV et al. Expression profiling of liposarcoma yields a multigene predictor of patient outcome and identifies genes that contribute to liposarcomagenesis. Cancer Res 2011 Apr 1;71(7):2697-705. PMID: 21335544

Accession URL: <https://www.ncbi.nlm.nih.gov/geo/query/acc.cgi?acc=GSE30929>

| GEO Sample                | Sample Identifier    | GEO Sample                | Sample Identifier    |
|---------------------------|----------------------|---------------------------|----------------------|
| <a href="#">GSM766533</a> | Sarcoma tumor DD0728 | <a href="#">GSM766553</a> | Sarcoma tumor DD610  |
| <a href="#">GSM766534</a> | Sarcoma tumor DD103  | <a href="#">GSM766554</a> | Sarcoma tumor DD611  |
| <a href="#">GSM766535</a> | Sarcoma tumor DD112  | <a href="#">GSM766555</a> | Sarcoma tumor DD6213 |
| <a href="#">GSM766536</a> | Sarcoma tumor DD172  | <a href="#">GSM766556</a> | Sarcoma tumor DD639  |
| <a href="#">GSM766537</a> | Sarcoma tumor DD176  | <a href="#">GSM766557</a> | Sarcoma tumor DD668  |
| <a href="#">GSM766538</a> | Sarcoma tumor DD188  | <a href="#">GSM766558</a> | Sarcoma tumor DD670  |
| <a href="#">GSM766539</a> | Sarcoma tumor DD216  | <a href="#">GSM766559</a> | Sarcoma tumor DD672  |
| <a href="#">GSM766540</a> | Sarcoma tumor DD226  | <a href="#">GSM766560</a> | Sarcoma tumor DD69   |
| <a href="#">GSM766541</a> | Sarcoma tumor DD330  | <a href="#">GSM766561</a> | Sarcoma tumor DD712  |
| <a href="#">GSM766542</a> | Sarcoma tumor DD344  | <a href="#">GSM766562</a> | Sarcoma tumor DD714  |
| <a href="#">GSM766543</a> | Sarcoma tumor DD382  | <a href="#">GSM766563</a> | Sarcoma tumor DD715  |
| <a href="#">GSM766544</a> | Sarcoma tumor DD391  | <a href="#">GSM766564</a> | Sarcoma tumor DD718  |
| <a href="#">GSM766545</a> | Sarcoma tumor DD442  | <a href="#">GSM766565</a> | Sarcoma tumor DD719  |
| <a href="#">GSM766546</a> | Sarcoma tumor DD454  | <a href="#">GSM766566</a> | Sarcoma tumor DD7533 |
| <a href="#">GSM766547</a> | Sarcoma tumor DD456  | <a href="#">GSM766567</a> | Sarcoma tumor DD8379 |
| <a href="#">GSM766548</a> | Sarcoma tumor DD474  | <a href="#">GSM766568</a> | Sarcoma tumor DD88   |
| <a href="#">GSM766549</a> | Sarcoma tumor DD506  | <a href="#">GSM766569</a> | Sarcoma tumor WD439* |
| <a href="#">GSM766550</a> | Sarcoma tumor DD513  | <a href="#">GSM766570</a> | Sarcoma tumor PL243* |
| <a href="#">GSM766551</a> | Sarcoma tumor DD595  | <a href="#">GSM766571</a> | Sarcoma tumor WD432* |
| <a href="#">GSM766552</a> | Sarcoma tumor DD597  | <a href="#">GSM766572</a> | Sarcoma tumor DD3516 |

*Labeled as DDLPS in GEO by authors \**

Table S4: WDLPS (n=52) Tumor Samples used in analyses from GSE30929 cohort

Whole-Transcript Expression Data for Liposarcoma (HG-U133A array)

Gobble RM, Qin LX, Brill ER, Angeles CV et al. Expression profiling of liposarcoma yields a multigene predictor of patient outcome and identifies genes that contribute to liposarcomagenesis. Cancer Res 2011 Apr 1;71(7):2697-705. PMID: 21335544

Accession URL: <https://www.ncbi.nlm.nih.gov/geo/query/acc.cgi?acc=GSE30929>

| GEO Sample                | Sample Identifier    | GEO Sample                | Sample Identifier    |
|---------------------------|----------------------|---------------------------|----------------------|
| <a href="#">GSM766621</a> | Sarcoma tumor WD401  | <a href="#">GSM766647</a> | Sarcoma tumor WD450  |
| <a href="#">GSM766622</a> | Sarcoma tumor WD602  | <a href="#">GSM766648</a> | Sarcoma tumor WD459  |
| <a href="#">GSM766623</a> | Sarcoma tumor WD72   | <a href="#">GSM766649</a> | Sarcoma tumor WD463  |
| <a href="#">GSM766624</a> | Sarcoma tumor ALT476 | <a href="#">GSM766650</a> | Sarcoma tumor WD468  |
| <a href="#">GSM766625</a> | Sarcoma tumor ALT479 | <a href="#">GSM766651</a> | Sarcoma tumor WD472  |
| <a href="#">GSM766626</a> | Sarcoma tumor ALT486 | <a href="#">GSM766652</a> | Sarcoma tumor WD499  |
| <a href="#">GSM766627</a> | Sarcoma tumor ALT497 | <a href="#">GSM766653</a> | Sarcoma tumor WD4994 |
| <a href="#">GSM766628</a> | Sarcoma tumor ALT500 | <a href="#">GSM766654</a> | Sarcoma tumor WD510  |
| <a href="#">GSM766629</a> | Sarcoma tumor WD444  | <a href="#">GSM766655</a> | Sarcoma tumor WD558  |
| <a href="#">GSM766630</a> | Sarcoma tumor WD700  | <a href="#">GSM766656</a> | Sarcoma tumor WD5700 |
| <a href="#">GSM766631</a> | Sarcoma tumor WD702  | <a href="#">GSM766657</a> | Sarcoma tumor WD589  |
| <a href="#">GSM766632</a> | Sarcoma tumor WD0611 | <a href="#">GSM766658</a> | Sarcoma tumor WD60   |
| <a href="#">GSM766633</a> | Sarcoma tumor WD194  | <a href="#">GSM766659</a> | Sarcoma tumor WD6233 |
| <a href="#">GSM766634</a> | Sarcoma tumor WD199  | <a href="#">GSM766660</a> | Sarcoma tumor WD687  |
| <a href="#">GSM766635</a> | Sarcoma tumor WD200  | <a href="#">GSM766661</a> | Sarcoma tumor WD688  |
| <a href="#">GSM766636</a> | Sarcoma tumor WD221  | <a href="#">GSM766662</a> | Sarcoma tumor WD691  |
| <a href="#">GSM766637</a> | Sarcoma tumor WD286  | <a href="#">GSM766663</a> | Sarcoma tumor WD696  |
| <a href="#">GSM766638</a> | Sarcoma tumor WD356  | <a href="#">GSM766664</a> | Sarcoma tumor WD701  |
| <a href="#">GSM766639</a> | Sarcoma tumor WD359  | <a href="#">GSM766665</a> | Sarcoma tumor WD705  |
| <a href="#">GSM766640</a> | Sarcoma tumor WD368  | <a href="#">GSM766666</a> | Sarcoma tumor WD706  |
| <a href="#">GSM766641</a> | Sarcoma tumor WD375  | <a href="#">GSM766667</a> | Sarcoma tumor WD721  |
| <a href="#">GSM766642</a> | Sarcoma tumor WD380  | <a href="#">GSM766668</a> | Sarcoma tumor WD724  |
| <a href="#">GSM766643</a> | Sarcoma tumor WD410  | <a href="#">GSM766669</a> | Sarcoma tumor WD725  |
| <a href="#">GSM766644</a> | Sarcoma tumor WD418  | <a href="#">GSM766670</a> | Sarcoma tumor WD9343 |
| <a href="#">GSM766645</a> | Sarcoma tumor WD419  | <a href="#">GSM766671</a> | Sarcoma tumor WD9370 |
| <a href="#">GSM766646</a> | Sarcoma tumor WD426  | <a href="#">GSM766672</a> | Sarcoma tumor WD0429 |

**Table S5:** Time course: Human Adipose Stem Cell Differentiation

Whole-Transcript Expression Data (HG-U133A array)

Mikkelsen TS, Xu Z, Zhang X, Wang L et al. Comparative epigenomic analysis of murine and human adipogenesis. Cell 2010 Oct 1;143(1):156-69. PMID: 20887899

Accession URL: <https://www.ncbi.nlm.nih.gov/geo/query/acc.cgi?acc=GSE20752> (Subseries GSE20697)

| Undifferentiated Adipose Stem Cells |                    | Differentiated Adipocytes |                   |
|-------------------------------------|--------------------|---------------------------|-------------------|
| GEO Sample                          | Sample Identifier  | GEO Sample                | Sample Identifier |
| <a href="#">GSM519587</a>           | hASC_t1_noFGF_rep1 | <a href="#">GSM519601</a> | hASC_t8_rep1      |
| <a href="#">GSM519588</a>           | hASC_t1_noFGF_rep2 | <a href="#">GSM519602</a> | hASC_t8_rep2      |
| <a href="#">GSM519589</a>           | hASC_t1_rep1       | <a href="#">GSM519603</a> | hASC_t9_rep1      |
| <a href="#">GSM519590</a>           | hASC_t1_rep2       | <a href="#">GSM519604</a> | hASC_t9_rep2      |

**Table S6.**

ASC Differentiation: Full Time Course

|                           |              |
|---------------------------|--------------|
| <a href="#">GSM519590</a> | hASC_t1_rep2 |
| <a href="#">GSM519591</a> | hASC_t2_rep1 |
| <a href="#">GSM519592</a> | hASC_t2_rep2 |
| <a href="#">GSM519593</a> | hASC_t3_rep1 |
| <a href="#">GSM519594</a> | hASC_t4_rep1 |
| <a href="#">GSM519595</a> | hASC_t4_rep2 |
| <a href="#">GSM519596</a> | hASC_t5_rep1 |
| <a href="#">GSM519597</a> | hASC_t5_rep2 |
| <a href="#">GSM519598</a> | hASC_t6_rep1 |
| <a href="#">GSM519599</a> | hASC_t6_rep2 |
| <a href="#">GSM519600</a> | hASC_t7_rep1 |
| <a href="#">GSM519601</a> | hASC_t8_rep1 |
| <a href="#">GSM519602</a> | hASC_t8_rep2 |
| <a href="#">GSM519603</a> | hASC_t9_rep1 |
| <a href="#">GSM519604</a> | hASC_t9_rep2 |

**Table S7:** DDLPS Tumor Samples (n=167) used in Genomics Profiling from MSK-IMPACT Cohort

## Genomics Profiling of Sarcoma Tumors by Sequencing

Nacev BA, Sanchez-Vega F, Smith SA, Antonescu CR, Rosenbaum E, Shi H, Tang C, Socci ND, Rana S, Gularte-Mérida R, Zehir A, Gounder MM, Bowler TG, Luthra A, Jadeja B, Okada A, Strong JA, Stoller J, Chan JE, Chi P, D'Angelo SP, Dickson MA, Kelly CM, Keohan ML, Movva S, Thornton K, Meyers PA, Wexler LH, Slotkin EK, Glade Bender JL, Shukla NN, Hensley ML, Healey JH, La Quaglia MP, Alektiar KM, Crago AM, Yoon SS, Untch BR, Chiang S, Agaram NP, Hameed MR, Berger MF, Solit DB, Schultz N, Ladanyi M, Singer S, Tap WD. Clinical sequencing of soft tissue and bone sarcomas delineates diverse genomic landscapes and potential therapeutic targets. Nat Commun. 2022 Jun 15;13(1):3405. doi: 10.1038/s41467-022-30453-x. PMID: 35705560; PMCID: PMC9200818.

Accession URL: [https://www.cbiportal.org/study/summary?id=sarcoma\\_mskcc\\_2022](https://www.cbiportal.org/study/summary?id=sarcoma_mskcc_2022)

Queried Genes: CDK4, MDM2, GLI1

| Study ID           | Sample ID         | Patient ID | MDM2         | CDK4          | GLI1                |
|--------------------|-------------------|------------|--------------|---------------|---------------------|
| sarcoma_mskcc_2022 | P-0000146-T01-IM3 | P-0000146  | AMP (driver) | AMP (driver)  | not profiled        |
| sarcoma_mskcc_2022 | P-0000796-T01-IM3 | P-0000796  | AMP (driver) | AMP (driver)  | not profiled        |
| sarcoma_mskcc_2022 | P-0001056-T01-IM3 | P-0001056  | AMP (driver) | AMP (driver)  | not profiled        |
| sarcoma_mskcc_2022 | P-0001596-T01-IM3 | P-0001596  | AMP (driver) | AMP (driver)  | not profiled        |
| sarcoma_mskcc_2022 | P-0001612-T01-IM3 | P-0001612  | AMP (driver) | AMP (driver)  | not profiled        |
| sarcoma_mskcc_2022 | P-0001870-T01-IM3 | P-0001870  | AMP (driver) | AMP (driver)  | not profiled        |
| sarcoma_mskcc_2022 | P-0002301-T01-IM3 | P-0002301  | AMP (driver) | AMP (driver)  | not profiled        |
| sarcoma_mskcc_2022 | P-0002326-T02-IM5 | P-0002326  | AMP (driver) | AMP (driver)  | no alteration       |
| sarcoma_mskcc_2022 | P-0002393-T01-IM3 | P-0002393  | AMP (driver) | AMP (driver)  | not profiled        |
| sarcoma_mskcc_2022 | P-0002919-T01-IM3 | P-0002919  | AMP (driver) | AMP (driver)  | not profiled        |
| sarcoma_mskcc_2022 | P-0003144-T01-IM5 | P-0003144  | AMP (driver) | AMP (driver)  | no alteration       |
| sarcoma_mskcc_2022 | P-0003171-T01-IM5 | P-0003171  | AMP (driver) | AMP (driver)  | no alteration       |
| sarcoma_mskcc_2022 | P-0003228-T01-IM5 | P-0003228  | AMP (driver) | AMP (driver)  | AMP (driver)        |
| sarcoma_mskcc_2022 | P-0003688-T01-IM5 | P-0003688  | AMP (driver) | AMP (driver)  | no alteration       |
| sarcoma_mskcc_2022 | P-0003874-T01-IM5 | P-0003874  | AMP (driver) | AMP (driver)  | no alteration       |
| sarcoma_mskcc_2022 | P-0004657-T02-IM5 | P-0004657  | AMP (driver) | AMP (driver)  | no alteration       |
| sarcoma_mskcc_2022 | P-0004682-T01-IM5 | P-0004682  | AMP (driver) | AMP (driver)  | no alteration       |
| sarcoma_mskcc_2022 | P-0004819-T01-IM5 | P-0004819  | AMP (driver) | AMP (driver)  | no alteration       |
| sarcoma_mskcc_2022 | P-0005175-T01-IM5 | P-0005175  | AMP (driver) | AMP (driver)  | no alteration       |
| sarcoma_mskcc_2022 | P-0005323-T01-IM5 | P-0005323  | AMP (driver) | AMP (driver)  | no alteration       |
| sarcoma_mskcc_2022 | P-0005396-T01-IM5 | P-0005396  | AMP (driver) | AMP (driver)  | no alteration       |
| sarcoma_mskcc_2022 | P-0005478-T01-IM5 | P-0005478  | AMP (driver) | AMP (driver)  | no alteration       |
| sarcoma_mskcc_2022 | P-0006258-T01-IM5 | P-0006258  | AMP (driver) | AMP (driver)  | AMP (driver)        |
| sarcoma_mskcc_2022 | P-0006284-T01-IM5 | P-0006284  | AMP (driver) | AMP (driver)  | no alteration       |
| sarcoma_mskcc_2022 | P-0006373-T01-IM5 | P-0006373  | AMP (driver) | AMP (driver)  | no alteration       |
| sarcoma_mskcc_2022 | P-0006577-T01-IM5 | P-0006577  | AMP (driver) | AMP (driver)  | no alteration       |
| sarcoma_mskcc_2022 | P-0006594-T01-IM5 | P-0006594  | AMP (driver) | AMP (driver)  | Q508*, AMP (driver) |
| sarcoma_mskcc_2022 | P-0006605-T01-IM5 | P-0006605  | AMP (driver) | no alteration | no alteration       |
| sarcoma_mskcc_2022 | P-0006799-T01-IM5 | P-0006799  | AMP (driver) | AMP (driver)  | AMP (driver)        |
| sarcoma_mskcc_2022 | P-0006982-T01-IM5 | P-0006982  | AMP (driver) | AMP (driver)  | no alteration       |
| sarcoma_mskcc_2022 | P-0007111-T01-IM5 | P-0007111  | AMP (driver) | AMP (driver)  | no alteration       |
| sarcoma_mskcc_2022 | P-0007536-T01-IM5 | P-0007536  | AMP (driver) | AMP (driver)  | AMP (driver)        |
| sarcoma_mskcc_2022 | P-0007735-T01-IM5 | P-0007735  | AMP (driver) | no alteration | no alteration       |

|                    |                   |           |               |                                         |                             |
|--------------------|-------------------|-----------|---------------|-----------------------------------------|-----------------------------|
| sarcoma_mskcc_2022 | P-0008708-T01-IM5 | P-0008708 | AMP (driver)  | AMP (driver)                            | no alteration               |
| sarcoma_mskcc_2022 | P-0008866-T01-IM5 | P-0008866 | AMP (driver)  | AMP (driver)                            | no alteration               |
| sarcoma_mskcc_2022 | P-0009147-T01-IM5 | P-0009147 | no alteration | AMP (driver)                            | AMP (driver)                |
| sarcoma_mskcc_2022 | P-0009246-T01-IM5 | P-0009246 | AMP (driver)  | AMP (driver)                            | GLI1-<br>ATXN7L3B<br>Fusion |
| sarcoma_mskcc_2022 | P-0009471-T01-IM5 | P-0009471 | AMP (driver)  | AMP (driver)                            | AMP (driver)                |
| sarcoma_mskcc_2022 | P-0009653-T01-IM5 | P-0009653 | AMP (driver)  | AMP (driver)                            | AMP (driver)                |
| sarcoma_mskcc_2022 | P-0009968-T01-IM5 | P-0009968 | AMP (driver)  | AMP (driver)                            | no alteration               |
| sarcoma_mskcc_2022 | P-0009987-T01-IM5 | P-0009987 | AMP (driver)  | no alteration                           | no alteration               |
| sarcoma_mskcc_2022 | P-0010314-T01-IM5 | P-0010314 | AMP (driver)  | AMP (driver)                            | no alteration               |
| sarcoma_mskcc_2022 | P-0010468-T04-IM6 | P-0010468 | AMP (driver)  | AMP (driver)                            | no alteration               |
| sarcoma_mskcc_2022 | P-0010589-T01-IM5 | P-0010589 | AMP (driver)  | AMP (driver)                            | AMP (driver)                |
| sarcoma_mskcc_2022 | P-0011094-T01-IM5 | P-0011094 | AMP (driver)  | AMP (driver)                            | no alteration               |
| sarcoma_mskcc_2022 | P-0011123-T01-IM5 | P-0011123 | AMP (driver)  | AMP (driver)                            | no alteration               |
| sarcoma_mskcc_2022 | P-0013205-T01-IM5 | P-0013205 | AMP (driver)  | AMP (driver)                            | no alteration               |
| sarcoma_mskcc_2022 | P-0013316-T01-IM5 | P-0013316 | AMP (driver)  | AMP (driver)                            | no alteration               |
| sarcoma_mskcc_2022 | P-0013365-T01-IM5 | P-0013365 | AMP (driver)  | AMP (driver)                            | no alteration               |
| sarcoma_mskcc_2022 | P-0013948-T01-IM5 | P-0013948 | AMP (driver)  | AMP (driver)                            | no alteration               |
| sarcoma_mskcc_2022 | P-0013959-T01-IM5 | P-0013959 | AMP (driver)  | AMP (driver)                            | no alteration               |
| sarcoma_mskcc_2022 | P-0014231-T01-IM6 | P-0014231 | AMP (driver)  | AMP (driver)                            | AMP (driver)                |
| sarcoma_mskcc_2022 | P-0014876-T01-IM6 | P-0014876 | AMP (driver)  | AMP (driver)                            | no alteration               |
| sarcoma_mskcc_2022 | P-0015631-T01-IM6 | P-0015631 | AMP (driver)  | AMP (driver)                            | no alteration               |
| sarcoma_mskcc_2022 | P-0015682-T01-IM6 | P-0015682 | AMP (driver)  | AMP (driver)                            | no alteration               |
| sarcoma_mskcc_2022 | P-0016132-T01-IM6 | P-0016132 | AMP (driver)  | AMP (driver)                            | no alteration               |
| sarcoma_mskcc_2022 | P-0016178-T02-IM6 | P-0016178 | AMP (driver)  | AMP (driver)                            | AMP (driver)                |
| sarcoma_mskcc_2022 | P-0017035-T01-IM6 | P-0017035 | AMP (driver)  | AMP (driver)                            | no alteration               |
| sarcoma_mskcc_2022 | P-0017423-T01-IM6 | P-0017423 | AMP (driver)  | AMP (driver)                            | no alteration               |
| sarcoma_mskcc_2022 | P-0017718-T01-IM6 | P-0017718 | AMP (driver)  | AMP (driver)                            | AMP (driver)                |
| sarcoma_mskcc_2022 | P-0018754-T01-IM6 | P-0018754 | AMP (driver)  | AMP (driver)                            | AMP (driver)                |
| sarcoma_mskcc_2022 | P-0018868-T01-IM6 | P-0018868 | AMP (driver)  | AMP (driver)                            | no alteration               |
| sarcoma_mskcc_2022 | P-0019498-T01-IM6 | P-0019498 | AMP (driver)  | AMP (driver)                            | AMP (driver)                |
| sarcoma_mskcc_2022 | P-0019508-T01-IM6 | P-0019508 | AMP (driver)  | AMP (driver)                            | no alteration               |
| sarcoma_mskcc_2022 | P-0019922-T01-IM6 | P-0019922 | AMP (driver)  | AMP (driver)                            | GLI1-LGR5<br>Fusion         |
| sarcoma_mskcc_2022 | P-0020491-T01-IM6 | P-0020491 | AMP (driver)  | AMP (driver)                            | no alteration               |
| sarcoma_mskcc_2022 | P-0020909-T01-IM6 | P-0020909 | AMP (driver)  | AMP (driver)                            | no alteration               |
| sarcoma_mskcc_2022 | P-0021032-T01-IM6 | P-0021032 | AMP (driver)  | AMP (driver)                            | AMP (driver)                |
| sarcoma_mskcc_2022 | P-0021313-T01-IM6 | P-0021313 | AMP (driver)  | AMP (driver)                            | no alteration               |
| sarcoma_mskcc_2022 | P-0021618-T01-IM6 | P-0021618 | AMP (driver)  | AMP (driver)                            | AMP (driver)                |
| sarcoma_mskcc_2022 | P-0021640-T01-IM6 | P-0021640 | AMP (driver)  | no alteration                           | no alteration               |
| sarcoma_mskcc_2022 | P-0021838-T01-IM6 | P-0021838 | AMP (driver)  | AMP (driver)                            | no alteration               |
| sarcoma_mskcc_2022 | P-0022148-T01-IM6 | P-0022148 | AMP (driver)  | AMP (driver)                            | no alteration               |
| sarcoma_mskcc_2022 | P-0022486-T01-IM6 | P-0022486 | AMP (driver)  | AMP (driver),<br>CDK4-MIR5700<br>Fusion | AMP (driver)                |
| sarcoma_mskcc_2022 | P-0022591-T01-IM6 | P-0022591 | AMP (driver)  | AMP (driver)                            | no alteration               |
| sarcoma_mskcc_2022 | P-0022861-T02-IM6 | P-0022861 | AMP (driver)  | AMP (driver)                            | AMP (driver)                |

|                    |                   |           |                                                    |              |               |
|--------------------|-------------------|-----------|----------------------------------------------------|--------------|---------------|
| sarcoma_mskcc_2022 | P-0022968-T01-IM6 | P-0022968 | AMP (driver)                                       | AMP (driver) | no alteration |
| sarcoma_mskcc_2022 | P-0023059-T01-IM6 | P-0023059 | AMP (driver)                                       | AMP (driver) | AMP (driver)  |
| sarcoma_mskcc_2022 | P-0024246-T01-IM6 | P-0024246 | AMP (driver)                                       | AMP (driver) | no alteration |
| sarcoma_mskcc_2022 | P-0025900-T01-IM6 | P-0025900 | AMP (driver)                                       | AMP (driver) | AMP (driver)  |
| sarcoma_mskcc_2022 | P-0026061-T01-IM6 | P-0026061 | AMP (driver)                                       | AMP (driver) | AMP (driver)  |
| sarcoma_mskcc_2022 | P-0026368-T01-IM6 | P-0026368 | AMP (driver)                                       | AMP (driver) | no alteration |
| sarcoma_mskcc_2022 | P-0026423-T01-IM6 | P-0026423 | AMP (driver)                                       | AMP (driver) | no alteration |
| sarcoma_mskcc_2022 | P-0026492-T01-IM6 | P-0026492 | AMP (driver)                                       | AMP (driver) | no alteration |
| sarcoma_mskcc_2022 | P-0026859-T01-IM6 | P-0026859 | AMP (driver)                                       | AMP (driver) | AMP (driver)  |
| sarcoma_mskcc_2022 | P-0026862-T01-IM6 | P-0026862 | D179E, AMP (driver)                                | AMP (driver) | no alteration |
| sarcoma_mskcc_2022 | P-0026913-T01-IM6 | P-0026913 | AMP (driver)                                       | AMP (driver) | AMP (driver)  |
| sarcoma_mskcc_2022 | P-0027938-T01-IM6 | P-0027938 | AMP (driver)                                       | AMP (driver) | no alteration |
| sarcoma_mskcc_2022 | P-0028063-T01-IM6 | P-0028063 | AMP (driver)                                       | AMP (driver) | no alteration |
| sarcoma_mskcc_2022 | P-0028166-T01-IM6 | P-0028166 | AMP (driver)                                       | AMP (driver) | no alteration |
| sarcoma_mskcc_2022 | P-0028347-T01-IM6 | P-0028347 | AMP (driver)                                       | AMP (driver) | no alteration |
| sarcoma_mskcc_2022 | P-0028519-T01-IM6 | P-0028519 | AMP (driver)                                       | AMP (driver) | AMP (driver)  |
| sarcoma_mskcc_2022 | P-0028595-T02-IM6 | P-0028595 | AMP (driver)                                       | AMP (driver) | no alteration |
| sarcoma_mskcc_2022 | P-0028636-T01-IM6 | P-0028636 | AMP (driver)                                       | AMP (driver) | AMP (driver)  |
| sarcoma_mskcc_2022 | P-0028678-T01-IM6 | P-0028678 | AMP (driver)                                       | AMP (driver) | no alteration |
| sarcoma_mskcc_2022 | P-0028915-T01-IM6 | P-0028915 | AMP (driver)                                       | AMP (driver) | no alteration |
| sarcoma_mskcc_2022 | P-0028991-T01-IM6 | P-0028991 | AMP (driver)                                       | AMP (driver) | no alteration |
| sarcoma_mskcc_2022 | P-0029373-T01-IM6 | P-0029373 | AMP (driver)                                       | AMP (driver) | AMP (driver)  |
| sarcoma_mskcc_2022 | P-0030087-T01-IM6 | P-0030087 | AMP (driver)                                       | AMP (driver) | no alteration |
| sarcoma_mskcc_2022 | P-0030122-T01-IM6 | P-0030122 | AMP (driver)                                       | AMP (driver) | no alteration |
| sarcoma_mskcc_2022 | P-0030137-T02-IM6 | P-0030137 | AMP (driver)                                       | AMP (driver) | no alteration |
| sarcoma_mskcc_2022 | P-0030245-T01-IM6 | P-0030245 | AMP (driver)                                       | AMP (driver) | no alteration |
| sarcoma_mskcc_2022 | P-0030267-T01-IM6 | P-0030267 | AMP (driver)                                       | AMP (driver) | AMP (driver)  |
| sarcoma_mskcc_2022 | P-0030333-T01-IM6 | P-0030333 | AMP (driver)                                       | AMP (driver) | no alteration |
| sarcoma_mskcc_2022 | P-0030514-T01-IM6 | P-0030514 | AMP (driver)                                       | AMP (driver) | no alteration |
| sarcoma_mskcc_2022 | P-0030720-T01-IM6 | P-0030720 | AMP (driver)                                       | AMP (driver) | no alteration |
| sarcoma_mskcc_2022 | P-0030722-T01-IM6 | P-0030722 | AMP (driver)                                       | AMP (driver) | no alteration |
| sarcoma_mskcc_2022 | P-0030733-T01-IM6 | P-0030733 | AMP (driver)                                       | AMP (driver) | AMP (driver)  |
| sarcoma_mskcc_2022 | P-0030885-T01-IM6 | P-0030885 | AMP (driver)                                       | AMP (driver) | no alteration |
| sarcoma_mskcc_2022 | P-0031044-T01-IM6 | P-0031044 | AMP (driver)                                       | AMP (driver) | AMP (driver)  |
| sarcoma_mskcc_2022 | P-0031152-T01-IM6 | P-0031152 | AMP (driver)                                       | AMP (driver) | no alteration |
| sarcoma_mskcc_2022 | P-0031396-T01-IM6 | P-0031396 | AMP (driver)                                       | AMP (driver) | no alteration |
| sarcoma_mskcc_2022 | P-0031452-T01-IM6 | P-0031452 | AMP (driver)                                       | AMP (driver) | no alteration |
| sarcoma_mskcc_2022 | P-0031514-T01-IM6 | P-0031514 | AMP (driver)                                       | AMP (driver) | no alteration |
| sarcoma_mskcc_2022 | P-0032007-T01-IM6 | P-0032007 | AMP (driver)                                       | AMP (driver) | AMP (driver)  |
| sarcoma_mskcc_2022 | P-0032043-T01-IM6 | P-0032043 | AMP (driver)                                       | AMP (driver) | no alteration |
| sarcoma_mskcc_2022 | P-0032096-T01-IM6 | P-0032096 | AMP (driver)                                       | AMP (driver) | AMP (driver)  |
| sarcoma_mskcc_2022 | P-0032211-T02-IM6 | P-0032211 | AMP (driver), Protein Fusion: mid-exon {TPH2:MDM2} | AMP (driver) | AMP (driver)  |
| sarcoma_mskcc_2022 | P-0032459-T01-IM6 | P-0032459 | AMP (driver)                                       | AMP (driver) | AMP (driver)  |

|                    |                   |           |                                                              |                                                            |                                                               |
|--------------------|-------------------|-----------|--------------------------------------------------------------|------------------------------------------------------------|---------------------------------------------------------------|
| sarcoma_mskcc_2022 | P-0033008-T01-IM6 | P-0033008 | AMP (driver)                                                 | AMP (driver)                                               | no alteration                                                 |
| sarcoma_mskcc_2022 | P-0033724-T01-IM6 | P-0033724 | AMP (driver)                                                 | AMP (driver)                                               | no alteration                                                 |
| sarcoma_mskcc_2022 | P-0033898-T01-IM6 | P-0033898 | AMP (driver)                                                 | AMP (driver)                                               | no alteration                                                 |
| sarcoma_mskcc_2022 | P-0033953-T01-IM6 | P-0033953 | AMP (driver)                                                 | AMP (driver)                                               | no alteration                                                 |
| sarcoma_mskcc_2022 | P-0033963-T01-IM6 | P-0033963 | AMP (driver)                                                 | AMP (driver)                                               | no alteration                                                 |
| sarcoma_mskcc_2022 | P-0034080-T02-IM6 | P-0034080 | AMP (driver)                                                 | AMP (driver)                                               | AMP (driver)                                                  |
| sarcoma_mskcc_2022 | P-0034262-T01-IM6 | P-0034262 | AMP (driver)                                                 | no alteration                                              | no alteration                                                 |
| sarcoma_mskcc_2022 | P-0034379-T01-IM6 | P-0034379 | AMP (driver)                                                 | AMP (driver)                                               | no alteration                                                 |
| sarcoma_mskcc_2022 | P-0034631-T01-IM6 | P-0034631 | AMP (driver)                                                 | AMP (driver)                                               | AMP (driver)                                                  |
| sarcoma_mskcc_2022 | P-0034684-T01-IM6 | P-0034684 | AMP (driver)                                                 | AMP (driver)                                               | no alteration                                                 |
| sarcoma_mskcc_2022 | P-0035694-T01-IM6 | P-0035694 | AMP (driver)                                                 | AMP (driver)                                               | no alteration                                                 |
| sarcoma_mskcc_2022 | P-0036132-T01-IM6 | P-0036132 | AMP (driver)                                                 | AMP (driver)                                               | no alteration                                                 |
| sarcoma_mskcc_2022 | P-0036282-T01-IM6 | P-0036282 | AMP (driver)                                                 | AMP (driver)                                               | no alteration                                                 |
| sarcoma_mskcc_2022 | P-0036526-T01-IM6 | P-0036526 | AMP (driver)                                                 | AMP (driver)                                               | AMP (driver)                                                  |
| sarcoma_mskcc_2022 | P-0036558-T01-IM6 | P-0036558 | AMP (driver)                                                 | AMP (driver)                                               | no alteration                                                 |
| sarcoma_mskcc_2022 | P-0036662-T01-IM6 | P-0036662 | AMP (driver)                                                 | AMP (driver)                                               | no alteration                                                 |
| sarcoma_mskcc_2022 | P-0036698-T01-IM6 | P-0036698 | AMP (driver)                                                 | AMP (driver)                                               | no alteration                                                 |
| sarcoma_mskcc_2022 | P-0037337-T01-IM6 | P-0037337 | AMP (driver)                                                 | AMP (driver)                                               | AMP (driver)                                                  |
| sarcoma_mskcc_2022 | P-0037728-T01-IM6 | P-0037728 | AMP (driver)                                                 | AMP (driver)                                               | no alteration                                                 |
| sarcoma_mskcc_2022 | P-0038298-T01-IM6 | P-0038298 | AMP (driver)                                                 | AMP (driver)                                               | no alteration                                                 |
| sarcoma_mskcc_2022 | P-0038773-T01-IM6 | P-0038773 | AMP (driver)                                                 | AMP (driver)                                               | no alteration                                                 |
| sarcoma_mskcc_2022 | P-0039139-T01-IM6 | P-0039139 | AMP (driver)                                                 | AMP (driver)                                               | no alteration                                                 |
| sarcoma_mskcc_2022 | P-0039480-T01-IM6 | P-0039480 | AMP (driver)                                                 | AMP (driver)                                               | AMP (driver)                                                  |
| sarcoma_mskcc_2022 | P-0040091-T01-IM6 | P-0040091 | AMP (driver)                                                 | AMP (driver)                                               | no alteration                                                 |
| sarcoma_mskcc_2022 | P-0040815-T01-IM6 | P-0040815 | AMP (driver)                                                 | AMP (driver),<br>Protein Fusion:<br>mid-exon<br>{CDK4:DCC} | no alteration                                                 |
| sarcoma_mskcc_2022 | P-0041422-T01-IM6 | P-0041422 | AMP (driver)                                                 | AMP (driver)                                               | no alteration                                                 |
| sarcoma_mskcc_2022 | P-0041513-T01-IM6 | P-0041513 | AMP (driver),<br>Protein Fusion:<br>mid-exon<br>{ABCC4:MDM2} | AMP (driver)                                               | no alteration                                                 |
| sarcoma_mskcc_2022 | P-0041627-T01-IM6 | P-0041627 | AMP (driver)                                                 | AMP (driver)                                               | no alteration                                                 |
| sarcoma_mskcc_2022 | P-0042355-T01-IM6 | P-0042355 | AMP (driver)                                                 | AMP (driver)                                               | no alteration                                                 |
| sarcoma_mskcc_2022 | P-0042527-T01-IM6 | P-0042527 | AMP (driver)                                                 | AMP (driver)                                               | no alteration                                                 |
| sarcoma_mskcc_2022 | P-0042879-T01-IM6 | P-0042879 | E346K, E421K,<br>K475N, AMP<br>(driver)                      | AMP (driver)                                               | no alteration                                                 |
| sarcoma_mskcc_2022 | P-0043065-T01-IM6 | P-0043065 | AMP (driver)                                                 | AMP (driver)                                               | no alteration                                                 |
| sarcoma_mskcc_2022 | P-0043148-T01-IM6 | P-0043148 | AMP (driver)                                                 | AMP (driver)                                               | no alteration                                                 |
| sarcoma_mskcc_2022 | P-0043632-T01-IM6 | P-0043632 | AMP (driver)                                                 | AMP (driver)                                               | AMP (driver),<br>Protein Fusion:<br>mid-exon<br>{GLI1:ZFAND3} |
| sarcoma_mskcc_2022 | P-0043703-T01-IM6 | P-0043703 | AMP (driver)                                                 | AMP (driver)                                               | AMP (driver)                                                  |
| sarcoma_mskcc_2022 | P-0044140-T01-IM6 | P-0044140 | AMP (driver)                                                 | AMP (driver)                                               | no alteration                                                 |
| sarcoma_mskcc_2022 | P-0044575-T01-IM6 | P-0044575 | AMP (driver)                                                 | AMP (driver)                                               | no alteration                                                 |
| sarcoma_mskcc_2022 | P-0044607-T01-IM6 | P-0044607 | AMP (driver)                                                 | AMP (driver)                                               | no alteration                                                 |

|                    |                   |           |                                                                   |               |               |
|--------------------|-------------------|-----------|-------------------------------------------------------------------|---------------|---------------|
| sarcoma_mskcc_2022 | P-0044741-T01-IM6 | P-0044741 | AMP (driver)                                                      | AMP (driver)  | no alteration |
| sarcoma_mskcc_2022 | P-0044885-T01-IM6 | P-0044885 | AMP (driver)                                                      | AMP (driver)  | no alteration |
| sarcoma_mskcc_2022 | P-0044911-T01-IM6 | P-0044911 | AMP (driver)                                                      | AMP (driver)  | no alteration |
| sarcoma_mskcc_2022 | P-0045656-T01-IM6 | P-0045656 | AMP (driver)                                                      | AMP (driver)  | no alteration |
| sarcoma_mskcc_2022 | P-0045729-T01-IM6 | P-0045729 | AMP (driver)                                                      | AMP (driver)  | no alteration |
| sarcoma_mskcc_2022 | P-0045832-T01-IM6 | P-0045832 | AMP (driver),<br>Protein Fusion:<br>out of frame<br>{MDM2:GNPTAB} | AMP (driver)  | no alteration |
| sarcoma_mskcc_2022 | P-0024168-T01-IM6 | P-0024168 | no alteration                                                     | no alteration | no alteration |
| sarcoma_mskcc_2022 | P-0026209-T01-IM6 | P-0026209 | no alteration                                                     | no alteration | no alteration |
| sarcoma_mskcc_2022 | P-0027663-T01-IM6 | P-0027663 | no alteration                                                     | no alteration | no alteration |
| sarcoma_mskcc_2022 | P-0030777-T01-IM6 | P-0030777 | no alteration                                                     | no alteration | no alteration |



**Table S8:** DDLPS Tumor Samples (n=59) used in Genomics and Transcriptome Profiling from TCGA-SARC Cohort

Profiling of Sarcoma Tumors by Sequencing

Accession URL: [https://www.cbiportal.org/study/summary?id=sarc\\_tcga\\_pan\\_can\\_atlas\\_2018](https://www.cbiportal.org/study/summary?id=sarc_tcga_pan_can_atlas_2018)

Queried Genes: MDM2, CDK4, GLI1, GLI2

| Study ID                     | Patient ID   | MDM2                                                               | CDK4                                                           | GLI1          | GLI2             |
|------------------------------|--------------|--------------------------------------------------------------------|----------------------------------------------------------------|---------------|------------------|
| sarc_tcga_pan_can_atlas_2018 | TCGA-3B-A9HJ | AMP (driver)                                                       | AMP (driver),<br>FRS2-CDK4<br>fusion                           | no alteration | no<br>alteration |
| sarc_tcga_pan_can_atlas_2018 | TCGA-3B-A9HL | AMP (driver)                                                       | AMP (driver)                                                   | no alteration | no<br>alteration |
| sarc_tcga_pan_can_atlas_2018 | TCGA-3B-A9HO | AMP (driver)                                                       | AMP (driver),<br>CDK4-PICSAR<br>fusion, RILPL1-<br>CDK4 fusion | no alteration | no<br>alteration |
| sarc_tcga_pan_can_atlas_2018 | TCGA-3R-A8YX | AMP (driver)                                                       | AMP (driver)                                                   | no alteration | no<br>alteration |
| sarc_tcga_pan_can_atlas_2018 | TCGA-DX-A1KU | AMP (driver),<br>MDM2-DDR2<br>fusion                               | AMP (driver)                                                   | AMP (driver)  | no<br>alteration |
| sarc_tcga_pan_can_atlas_2018 | TCGA-DX-A1KW | AMP (driver)                                                       | AMP (driver)                                                   | no alteration | no<br>alteration |
| sarc_tcga_pan_can_atlas_2018 | TCGA-DX-A1KX | no alteration                                                      | no alteration                                                  | no alteration | V796M            |
| sarc_tcga_pan_can_atlas_2018 | TCGA-DX-A1KZ | AMP (driver)                                                       | AMP (driver)                                                   | no alteration | no<br>alteration |
| sarc_tcga_pan_can_atlas_2018 | TCGA-DX-A1L0 | AMP (driver)                                                       | AMP (driver)                                                   | no alteration | no<br>alteration |
| sarc_tcga_pan_can_atlas_2018 | TCGA-DX-A1L1 | AMP (driver)                                                       | no alteration                                                  | no alteration | no<br>alteration |
| sarc_tcga_pan_can_atlas_2018 | TCGA-DX-A1L3 | AMP (driver),<br>MDM2-<br>FMO6P fusion                             | AMP (driver)                                                   | no alteration | no<br>alteration |
| sarc_tcga_pan_can_atlas_2018 | TCGA-DX-A1L4 | AMP (driver)                                                       | AMP (driver)                                                   | no alteration | no<br>alteration |
| sarc_tcga_pan_can_atlas_2018 | TCGA-DX-A23R | AMP (driver)                                                       | AMP (driver)                                                   | AMP (driver)  | no<br>alteration |
| sarc_tcga_pan_can_atlas_2018 | TCGA-DX-A23T | AMP (driver)                                                       | AMP (driver)                                                   | no alteration | no<br>alteration |
| sarc_tcga_pan_can_atlas_2018 | TCGA-DX-A23V | AMP (driver)                                                       | AMP (driver),<br>DAB1-CDK4<br>fusion, OMA1-<br>CDK4 fusion     | no alteration | no<br>alteration |
| sarc_tcga_pan_can_atlas_2018 | TCGA-DX-A23Y | AMP (driver),<br>MDM2-<br>C12orf50<br>fusion, NT5E-<br>MDM2 fusion | AMP (driver)                                                   | no alteration | no<br>alteration |
| sarc_tcga_pan_can_atlas_2018 | TCGA-DX-A23Z | AMP (driver)                                                       | AMP (driver)                                                   | HOMDEL        | no<br>alteration |
| sarc_tcga_pan_can_atlas_2018 | TCGA-DX-A240 | MDM2-<br>SLAMF9<br>fusion                                          | no alteration                                                  | no alteration | no<br>alteration |
| sarc_tcga_pan_can_atlas_2018 | TCGA-DX-A2J0 | AMP (driver)                                                       | AMP (driver)                                                   | no alteration | no<br>alteration |

|                              |              |                                               |                                        |               |                  |
|------------------------------|--------------|-----------------------------------------------|----------------------------------------|---------------|------------------|
| sarc_tcga_pan_can_atlas_2018 | TCGA-DX-A2J1 | AMP (driver),<br>MDM2-NAV3<br>fusion          | AMP (driver)                           | no alteration | no<br>alteration |
| sarc_tcga_pan_can_atlas_2018 | TCGA-DX-A2J4 | AMP (driver)                                  | AMP (driver)                           | no alteration | no<br>alteration |
| sarc_tcga_pan_can_atlas_2018 | TCGA-DX-A3LS | L230F, AMP<br>(driver)                        | AMP (driver)                           | no alteration | no<br>alteration |
| sarc_tcga_pan_can_atlas_2018 | TCGA-DX-A3LT | AMP (driver)                                  | AMP (driver)                           | no alteration | no<br>alteration |
| sarc_tcga_pan_can_atlas_2018 | TCGA-DX-A3LU | AMP (driver)                                  | AMP (driver)                           | no alteration | no<br>alteration |
| sarc_tcga_pan_can_atlas_2018 | TCGA-DX-A3LW | AMP (driver)                                  | AMP (driver)                           | no alteration | no<br>alteration |
| sarc_tcga_pan_can_atlas_2018 | TCGA-DX-A3LY | AMP (driver)                                  | AMP (driver)                           | no alteration | no<br>alteration |
| sarc_tcga_pan_can_atlas_2018 | TCGA-DX-A3M1 | S221C, AMP<br>(driver),<br>MDM2-SYK<br>fusion | AMP (driver)                           | no alteration | no<br>alteration |
| sarc_tcga_pan_can_atlas_2018 | TCGA-DX-A3U5 | AMP (driver)                                  | AMP (driver)                           | no alteration | no<br>alteration |
| sarc_tcga_pan_can_atlas_2018 | TCGA-DX-A3U6 | AMP (driver)                                  | AMP (driver)                           | AMP (driver)  | no<br>alteration |
| sarc_tcga_pan_can_atlas_2018 | TCGA-DX-A48N | MDM2-<br>POLR3B fusion                        | no alteration                          | no alteration | no<br>alteration |
| sarc_tcga_pan_can_atlas_2018 | TCGA-DX-A6BE | AMP (driver)                                  | AMP (driver)                           | AMP (driver)  | no<br>alteration |
| sarc_tcga_pan_can_atlas_2018 | TCGA-DX-A6BF | AMP (driver)                                  | AMP (driver)                           | no alteration | no<br>alteration |
| sarc_tcga_pan_can_atlas_2018 | TCGA-DX-A6BH | AMP (driver)                                  | AMP (driver)                           | no alteration | no<br>alteration |
| sarc_tcga_pan_can_atlas_2018 | TCGA-DX-A7EI | AMP (driver)                                  | AMP (driver)                           | no alteration | no<br>alteration |
| sarc_tcga_pan_can_atlas_2018 | TCGA-DX-A7ES | AMP (driver)                                  | AMP (driver)                           | no alteration | no<br>alteration |
| sarc_tcga_pan_can_atlas_2018 | TCGA-DX-AB2F | AMP (driver),<br>MDM2-FRS2<br>fusion          | AMP (driver)                           | AMP (driver)  | no<br>alteration |
| sarc_tcga_pan_can_atlas_2018 | TCGA-DX-AB2G | AMP (driver),<br>MDM2-DIP2B<br>fusion         | AMP (driver)                           | no alteration | no<br>alteration |
| sarc_tcga_pan_can_atlas_2018 | TCGA-DX-AB2H | AMP (driver)                                  | AMP (driver),<br>ZFC3H1-CDK4<br>fusion | AMP (driver)  | no<br>alteration |
| sarc_tcga_pan_can_atlas_2018 | TCGA-DX-AB35 | AMP (driver)                                  | AMP (driver)                           | no alteration | no<br>alteration |
| sarc_tcga_pan_can_atlas_2018 | TCGA-DX-AB36 | AMP (driver)                                  | AMP (driver),<br>CDK4-ANO5<br>fusion   | no alteration | no<br>alteration |
| sarc_tcga_pan_can_atlas_2018 | TCGA-DX-AB37 | AMP (driver)                                  | no alteration                          | no alteration | no<br>alteration |
| sarc_tcga_pan_can_atlas_2018 | TCGA-DX-AB3A | AMP (driver),<br>MDM2-FGF18<br>fusion         | AMP (driver)                           | no alteration | no<br>alteration |
| sarc_tcga_pan_can_atlas_2018 | TCGA-FX-A2QS | AMP (driver)                                  | AMP (driver)                           | AMP (driver)  | no<br>alteration |

|                              |              |                                                   |               |               |               |
|------------------------------|--------------|---------------------------------------------------|---------------|---------------|---------------|
| sarc_tcga_pan_can_atlas_2018 | TCGA-FX-A3NK | MDM2-MYRFL fusion                                 | no alteration | R496L         | no alteration |
| sarc_tcga_pan_can_atlas_2018 | TCGA-IF-A3RQ | MDM2-ZCCHC5 fusion                                | no alteration | no alteration | no alteration |
| sarc_tcga_pan_can_atlas_2018 | TCGA-SG-A6Z7 | AMP (driver), LINC-PINT-MDM2 fusion               | AMP (driver)  | AMP (driver)  | no alteration |
| sarc_tcga_pan_can_atlas_2018 | TCGA-WK-A8XO | AMP (driver), MDM2-IL22 fusion, MDM2-PTPRR fusion | AMP (driver)  | no alteration | no alteration |
| sarc_tcga_pan_can_atlas_2018 | TCGA-3B-A9HI | no alteration                                     | no alteration | no alteration | no alteration |
| sarc_tcga_pan_can_atlas_2018 | TCGA-DX-A1KY | no alteration                                     | no alteration | no alteration | no alteration |
| sarc_tcga_pan_can_atlas_2018 | TCGA-DX-A1L2 | no alteration                                     | no alteration | no alteration | no alteration |
| sarc_tcga_pan_can_atlas_2018 | TCGA-DX-A23U | no alteration                                     | no alteration | no alteration | no alteration |
| sarc_tcga_pan_can_atlas_2018 | TCGA-DX-A2IZ | no alteration                                     | no alteration | no alteration | no alteration |
| sarc_tcga_pan_can_atlas_2018 | TCGA-DX-A3M2 | no alteration                                     | no alteration | no alteration | no alteration |
| sarc_tcga_pan_can_atlas_2018 | TCGA-DX-A6BG | no alteration                                     | no alteration | no alteration | no alteration |
| sarc_tcga_pan_can_atlas_2018 | TCGA-DX-A6BK | no alteration                                     | no alteration | no alteration | no alteration |
| sarc_tcga_pan_can_atlas_2018 | TCGA-MO-A47P | no alteration                                     | no alteration | no alteration | no alteration |
| sarc_tcga_pan_can_atlas_2018 | TCGA-QQ-A5VA | no alteration                                     | no alteration | no alteration | no alteration |
| sarc_tcga_pan_can_atlas_2018 | TCGA-WK-A8XQ | no alteration                                     | no alteration | no alteration | no alteration |
| sarc_tcga_pan_can_atlas_2018 | TCGA-Z4-A9VC | no alteration                                     | no alteration | no alteration | no alteration |

**Table S9:** DDLPS Tumor Samples (n=50) used in Genomics and Transcriptome Profiling from GSE21124

Profiling of Sarcoma Tumors by Array

Barretina J, Taylor BS, Banerji S, Ramos AH et al. Subtype-specific genomic alterations define new targets for soft-tissue sarcoma therapy. *Nat Genet* 2010 Aug;42(8):715-21. PMID: [20601955](https://pubmed.ncbi.nlm.nih.gov/20601955/)

Accession URL(s): [https://www.cbioportal.org/study/summary?id=sarc\\_mskcc](https://www.cbioportal.org/study/summary?id=sarc_mskcc)  
<https://www.ncbi.nlm.nih.gov/geo/query/acc.cgi?acc=GSE21124>

Queried Genes: MDM2, CDK4, GLI1, GLI2

Expression Profiling (GSE21122, CBioPortal)

| GEO Sample                | Sample Identifier    | GEO Sample                | Sample Identifier    |
|---------------------------|----------------------|---------------------------|----------------------|
| <a href="#">GSM528276</a> | Sarcoma tumor PT1DD  | <a href="#">GSM528303</a> | Sarcoma tumor PT31DD |
| <a href="#">GSM528277</a> | Sarcoma tumor PT2DD  | <a href="#">GSM528304</a> | Sarcoma tumor PT32DD |
| <a href="#">GSM528278</a> | Sarcoma PT3DD        | <a href="#">GSM528305</a> | Sarcoma tumor PT33DD |
| <a href="#">GSM528282</a> | Sarcoma tumor PT7DD  | <a href="#">GSM528306</a> | Sarcoma tumor PT34DD |
| <a href="#">GSM528283</a> | Sarcoma tumor PT8DD  | <a href="#">GSM528307</a> | Sarcoma tumor PT35DD |
| <a href="#">GSM528284</a> | Sarcoma tumor PT10DD | <a href="#">GSM528308</a> | Sarcoma tumor PT36DD |
| <a href="#">GSM528285</a> | Sarcoma tumor PT12DD | <a href="#">GSM528309</a> | Sarcoma tumor PT37DD |
| <a href="#">GSM528286</a> | Sarcoma tumor PT14DD | <a href="#">GSM528310</a> | Sarcoma tumor PT38DD |
| <a href="#">GSM528287</a> | Sarcoma tumor PT15DD | <a href="#">GSM528311</a> | Sarcoma tumor PT39DD |
| <a href="#">GSM528288</a> | Sarcoma tumor PT16DD | <a href="#">GSM528312</a> | Sarcoma tumor PT40DD |
| <a href="#">GSM528289</a> | Sarcoma tumor PT17DD | <a href="#">GSM528313</a> | Sarcoma tumor PT41DD |
| <a href="#">GSM528290</a> | Sarcoma tumor PT18DD | <a href="#">GSM528314</a> | Sarcoma tumor PT42DD |
| <a href="#">GSM528291</a> | Sarcoma tumor PT19DD | <a href="#">GSM528315</a> | Sarcoma tumor PT43DD |
| <a href="#">GSM528292</a> | Sarcoma tumor PT20DD | <a href="#">GSM528316</a> | Sarcoma tumor PT44DD |
| <a href="#">GSM528293</a> | Sarcoma tumor PT21DD | <a href="#">GSM528317</a> | Sarcoma tumor PT46DD |
| <a href="#">GSM528294</a> | Sarcoma tumor PT22DD | <a href="#">GSM528318</a> | Sarcoma tumor PT47DD |
| <a href="#">GSM528295</a> | Sarcoma tumor PT23DD | <a href="#">GSM528319</a> | Sarcoma tumor PT48DD |
| <a href="#">GSM528296</a> | Sarcoma tumor PT24DD | <a href="#">GSM528320</a> | Sarcoma tumor PT49DD |
| <a href="#">GSM528297</a> | Sarcoma tumor PT25DD | <a href="#">GSM528321</a> | Sarcoma tumor PT50DD |
| <a href="#">GSM528298</a> | Sarcoma tumor PT26DD |                           |                      |
| <a href="#">GSM528299</a> | Sarcoma tumor PT27DD |                           |                      |
| <a href="#">GSM528300</a> | Sarcoma tumor PT28DD |                           |                      |
| <a href="#">GSM528301</a> | Sarcoma tumor PT29DD |                           |                      |
| <a href="#">GSM528302</a> | Sarcoma tumor PT30DD |                           |                      |

**Table S10:** Normal Fat Samples (n=9) used in Transcriptome Profiling from GSE21124

Profiling of Sarcoma Tumors by Array

Barretina J, Taylor BS, Banerji S, Ramos AH et al. Subtype-specific genomic alterations define new targets for soft-tissue sarcoma therapy. *Nat Genet* 2010 Aug;42(8):715-21. PMID: [20601955](https://pubmed.ncbi.nlm.nih.gov/20601955/)

Accession URL(s): [https://www.cbioportal.org/study/summary?id=sarc\\_mskcc](https://www.cbioportal.org/study/summary?id=sarc_mskcc)  
<https://www.ncbi.nlm.nih.gov/geo/query/acc.cgi?acc=GSE21124>

Queried Genes: MDM2, CDK4, GLI1, GLI2

Expression Profiling (GSE21122, CBioPortal)

| GEO Sample                                                                           | Sample Identifier        |
|--------------------------------------------------------------------------------------|--------------------------|
| <a href="https://www.ncbi.nlm.nih.gov/geo/query/acc.cgi?acc=GSM528425">GSM528425</a> | Control normal fat NF115 |
| <a href="https://www.ncbi.nlm.nih.gov/geo/query/acc.cgi?acc=GSM528426">GSM528426</a> | Control normal fat NF117 |
| <a href="https://www.ncbi.nlm.nih.gov/geo/query/acc.cgi?acc=GSM528427">GSM528427</a> | Control normal fat NF119 |
| <a href="https://www.ncbi.nlm.nih.gov/geo/query/acc.cgi?acc=GSM528428">GSM528428</a> | Control normal fat NF180 |
| <a href="https://www.ncbi.nlm.nih.gov/geo/query/acc.cgi?acc=GSM528429">GSM528429</a> | Control normal fat NF225 |
| <a href="https://www.ncbi.nlm.nih.gov/geo/query/acc.cgi?acc=GSM528430">GSM528430</a> | Control normal fat NF84  |
| <a href="https://www.ncbi.nlm.nih.gov/geo/query/acc.cgi?acc=GSM528431">GSM528431</a> | Control normal fat NF90  |
| <a href="https://www.ncbi.nlm.nih.gov/geo/query/acc.cgi?acc=GSM528432">GSM528432</a> | Control normal fat NF92  |
| <a href="https://www.ncbi.nlm.nih.gov/geo/query/acc.cgi?acc=GSM528433">GSM528433</a> | Control normal fat NF95  |

**Table S11:** Matched Normal Samples (n=50) used in Genomics Profiling from GSE21124

Profiling of Sarcoma Tumors by Array

Barretina J, Taylor BS, Banerji S, Ramos AH et al. Subtype-specific genomic alterations define new targets for soft-tissue sarcoma therapy. *Nat Genet* 2010 Aug;42(8):715-21. PMID: [20601955](https://pubmed.ncbi.nlm.nih.gov/20601955/)

Accession URL(s): [https://www.cbioportal.org/study/summary?id=sarc\\_mskcc](https://www.cbioportal.org/study/summary?id=sarc_mskcc)  
<https://www.ncbi.nlm.nih.gov/geo/query/acc.cgi?acc=GSE21124>

Queried Genes: MDM2, CDK4, GLI1, GLI2

Genomics Profiling (GSE21123, CBioPortal)

| GEO Sample                | Sample Identifier               | GEO Sample                | Sample Identifier               |
|---------------------------|---------------------------------|---------------------------|---------------------------------|
| <a href="#">GSM529100</a> | Matched normal for tumor PT1DD  | <a href="#">GSM529125</a> | Matched normal for tumor PT26DD |
| <a href="#">GSM529101</a> | Matched normal for tumor PT2DD  | <a href="#">GSM529126</a> | Matched normal for tumor PT27DD |
| <a href="#">GSM529102</a> | Matched normal for tumor PT3DD  | <a href="#">GSM529127</a> | Matched normal for tumor PT28DD |
| <a href="#">GSM529103</a> | Matched normal for tumor PT4DD  | <a href="#">GSM529128</a> | Matched normal for tumor PT29DD |
| <a href="#">GSM529104</a> | Matched normal for tumor PT5DD  | <a href="#">GSM529129</a> | Matched normal for tumor PT30DD |
| <a href="#">GSM529105</a> | Matched normal for tumor PT6DD  | <a href="#">GSM529130</a> | Matched normal for tumor PT31DD |
| <a href="#">GSM529106</a> | Matched normal for tumor PT7DD  | <a href="#">GSM529131</a> | Matched normal for tumor PT32DD |
| <a href="#">GSM529107</a> | Matched normal for tumor PT8DD  | <a href="#">GSM529132</a> | Matched normal for tumor PT33DD |
| <a href="#">GSM529108</a> | Matched normal for tumor PT9DD  | <a href="#">GSM529133</a> | Matched normal for tumor PT34DD |
| <a href="#">GSM529109</a> | Matched normal for tumor PT10DD | <a href="#">GSM529134</a> | Matched normal for tumor PT35DD |
| <a href="#">GSM529110</a> | Matched normal for tumor PT11DD | <a href="#">GSM529135</a> | Matched normal for tumor PT36DD |
| <a href="#">GSM529111</a> | Matched normal for tumor PT12DD | <a href="#">GSM529136</a> | Matched normal for tumor PT37DD |
| <a href="#">GSM529112</a> | Matched normal for tumor PT13DD | <a href="#">GSM529137</a> | Matched normal for tumor PT38DD |
| <a href="#">GSM529113</a> | Matched normal for tumor PT14DD | <a href="#">GSM529138</a> | Matched normal for tumor PT39DD |
| <a href="#">GSM529114</a> | Matched normal for tumor PT15DD | <a href="#">GSM529139</a> | Matched normal for tumor PT40DD |
| <a href="#">GSM529115</a> | Matched normal for tumor PT16DD | <a href="#">GSM529140</a> | Matched normal for tumor PT41DD |
| <a href="#">GSM529116</a> | Matched normal for tumor PT17DD | <a href="#">GSM529141</a> | Matched normal for tumor PT42DD |
| <a href="#">GSM529117</a> | Matched normal for tumor PT18DD | <a href="#">GSM529142</a> | Matched normal for tumor PT43DD |
| <a href="#">GSM529118</a> | Matched normal for tumor PT19DD | <a href="#">GSM529143</a> | Matched normal for tumor PT44DD |
| <a href="#">GSM529119</a> | Matched normal for tumor PT20DD | <a href="#">GSM529144</a> | Matched normal for tumor PT45DD |
| <a href="#">GSM529120</a> | Matched normal for tumor PT21DD | <a href="#">GSM529145</a> | Matched normal for tumor PT46DD |
| <a href="#">GSM529121</a> | Matched normal for tumor PT22DD | <a href="#">GSM529146</a> | Matched normal for tumor PT47DD |
| <a href="#">GSM529122</a> | Matched normal for tumor PT23DD | <a href="#">GSM529147</a> | Matched normal for tumor PT48DD |
| <a href="#">GSM529123</a> | Matched normal for tumor PT24DD | <a href="#">GSM529148</a> | Matched normal for tumor PT49DD |
| <a href="#">GSM529124</a> | Matched normal for tumor PT25DD | <a href="#">GSM529149</a> | Matched normal for tumor PT50DD |

**Table S12:** Tumor Samples (n=50) used in Genomics Profiling from GSE21124

Profiling of Sarcoma Tumors by Array

Barretina J, Taylor BS, Banerji S, Ramos AH et al. Subtype-specific genomic alterations define new targets for soft-tissue sarcoma therapy. *Nat Genet* 2010 Aug;42(8):715-21. PMID: [20601955](https://pubmed.ncbi.nlm.nih.gov/20601955/)

Accession URL(s): [https://www.cbioportal.org/study/summary?id=sarc\\_mskcc](https://www.cbioportal.org/study/summary?id=sarc_mskcc)  
<https://www.ncbi.nlm.nih.gov/geo/query/acc.cgi?acc=GSE21124>

Queried Genes: MDM2, CDK4, GLI1, GLI2. Genomics Profiling (GSE21123, CBioPortal)

| GEO Sample                | Sample Identifier    | GEO Sample                | Sample Identifier    |
|---------------------------|----------------------|---------------------------|----------------------|
| <a href="#">GSM528890</a> | Sarcoma tumor PT1DD  | <a href="#">GSM528919</a> | Sarcoma tumor PT30DD |
| <a href="#">GSM528891</a> | Sarcoma tumor PT2DD  | <a href="#">GSM528920</a> | Sarcoma tumor PT31DD |
| <a href="#">GSM528892</a> | Sarcoma tumor PT3DD  | <a href="#">GSM528921</a> | Sarcoma tumor PT32DD |
| <a href="#">GSM528896</a> | Sarcoma tumor PT7DD  | <a href="#">GSM528922</a> | Sarcoma tumor PT33DD |
| <a href="#">GSM528897</a> | Sarcoma tumor PT8DD  | <a href="#">GSM528923</a> | Sarcoma tumor PT34DD |
| <a href="#">GSM528898</a> | Sarcoma tumor PT9DD  | <a href="#">GSM528924</a> | Sarcoma tumor PT35DD |
| <a href="#">GSM528899</a> | Sarcoma tumor PT10DD | <a href="#">GSM528925</a> | Sarcoma tumor PT36DD |
| <a href="#">GSM528900</a> | Sarcoma tumor PT11DD | <a href="#">GSM528926</a> | Sarcoma tumor PT37DD |
| <a href="#">GSM528901</a> | Sarcoma tumor PT12DD | <a href="#">GSM528927</a> | Sarcoma tumor PT38DD |
| <a href="#">GSM528902</a> | Sarcoma tumor PT13DD | <a href="#">GSM528928</a> | Sarcoma tumor PT39DD |
| <a href="#">GSM528903</a> | Sarcoma tumor PT14DD | <a href="#">GSM528929</a> | Sarcoma tumor PT40DD |
| <a href="#">GSM528904</a> | Sarcoma tumor PT15DD | <a href="#">GSM528930</a> | Sarcoma tumor PT41DD |
| <a href="#">GSM528905</a> | Sarcoma tumor PT16DD | <a href="#">GSM528931</a> | Sarcoma tumor PT42DD |
| <a href="#">GSM528906</a> | Sarcoma tumor PT17DD | <a href="#">GSM528932</a> | Sarcoma tumor PT43DD |
| <a href="#">GSM528907</a> | Sarcoma tumor PT18DD | <a href="#">GSM528933</a> | Sarcoma tumor PT44DD |
| <a href="#">GSM528908</a> | Sarcoma tumor PT19DD | <a href="#">GSM528934</a> | Sarcoma tumor PT45DD |
| <a href="#">GSM528909</a> | Sarcoma tumor PT20DD | <a href="#">GSM528935</a> | Sarcoma tumor PT46DD |
| <a href="#">GSM528910</a> | Sarcoma tumor PT21DD | <a href="#">GSM528936</a> | Sarcoma tumor PT47DD |
| <a href="#">GSM528911</a> | Sarcoma tumor PT22DD | <a href="#">GSM528937</a> | Sarcoma tumor PT48DD |
| <a href="#">GSM528912</a> | Sarcoma tumor PT23DD | <a href="#">GSM528938</a> | Sarcoma tumor PT49DD |
| <a href="#">GSM528913</a> | Sarcoma tumor PT24DD | <a href="#">GSM528939</a> | Sarcoma tumor PT50DD |
| <a href="#">GSM528914</a> | Sarcoma tumor PT25DD |                           |                      |
| <a href="#">GSM528915</a> | Sarcoma tumor PT26DD |                           |                      |
| <a href="#">GSM528916</a> | Sarcoma tumor PT27DD |                           |                      |
| <a href="#">GSM528917</a> | Sarcoma tumor PT28DD |                           |                      |
| <a href="#">GSM528918</a> | Sarcoma tumor PT29DD |                           |                      |

**Table S13:** Genomic Alterations in Tumor Samples (n=50) used in Genomics Profiling from GSE21124

Profiling of Sarcoma Tumors by Array

Barretina J, Taylor BS, Banerji S, Ramos AH et al. Subtype-specific genomic alterations define new targets for soft-tissue sarcoma therapy. *Nat Genet* 2010 Aug;42(8):715-21. PMID: [20601955](https://pubmed.ncbi.nlm.nih.gov/20601955/)

Accession URL(s): [https://www.cbioportal.org/study/summary?id=sarc\\_mskcc](https://www.cbioportal.org/study/summary?id=sarc_mskcc)  
<https://www.ncbi.nlm.nih.gov/geo/query/acc.cgi?acc=GSE21124>

Queried Genes: MDM2, CDK4, GLI1, GLI2

Genomics Profiling (GSE21123, CBioPortal)

| Study ID   | Patient ID | MDM2          | CDK4          | GLI1          | GLI2          |
|------------|------------|---------------|---------------|---------------|---------------|
| sarc_mskcc | PT10DD     | AMP (driver)  | AMP (driver)  | no alteration | no alteration |
| sarc_mskcc | PT11DD     | AMP (driver)  | AMP (driver)  | no alteration | no alteration |
| sarc_mskcc | PT12DD     | AMP (driver)  | AMP (driver)  | no alteration | no alteration |
| sarc_mskcc | PT13DD     | no alteration | no alteration | no alteration | AMP           |
| sarc_mskcc | PT14DD     | AMP (driver)  | no alteration | no alteration | no alteration |
| sarc_mskcc | PT15DD     | AMP (driver)  | AMP (driver)  | no alteration | no alteration |
| sarc_mskcc | PT16DD     | AMP (driver)  | AMP (driver)  | no alteration | no alteration |
| sarc_mskcc | PT17DD     | AMP (driver)  | AMP (driver)  | no alteration | no alteration |
| sarc_mskcc | PT18DD     | AMP (driver)  | AMP (driver)  | no alteration | no alteration |
| sarc_mskcc | PT19DD     | AMP (driver)  | AMP (driver)  | no alteration | no alteration |
| sarc_mskcc | PT1DD      | AMP (driver)  | AMP (driver)  | AMP (driver)  | no alteration |
| sarc_mskcc | PT22DD     | AMP (driver)  | AMP (driver)  | no alteration | no alteration |
| sarc_mskcc | PT23DD     | AMP (driver)  | AMP (driver)  | no alteration | no alteration |
| sarc_mskcc | PT25DD     | AMP (driver)  | AMP (driver)  | AMP (driver)  | no alteration |
| sarc_mskcc | PT26DD     | AMP (driver)  | AMP (driver)  | no alteration | no alteration |
| sarc_mskcc | PT27DD     | AMP (driver)  | AMP (driver)  | AMP (driver)  | no alteration |
| sarc_mskcc | PT28DD     | AMP (driver)  | AMP (driver)  | AMP (driver)  | no alteration |
| sarc_mskcc | PT29DD     | AMP (driver)  | AMP (driver)  | no alteration | no alteration |
| sarc_mskcc | PT2DD      | AMP (driver)  | AMP (driver)  | no alteration | no alteration |
| sarc_mskcc | PT30DD     | AMP (driver)  | AMP (driver)  | no alteration | no alteration |
| sarc_mskcc | PT31DD     | AMP (driver)  | AMP (driver)  | no alteration | no alteration |
| sarc_mskcc | PT32DD     | AMP (driver)  | AMP (driver)  | no alteration | no alteration |
| sarc_mskcc | PT33DD     | AMP (driver)  | AMP (driver)  | no alteration | no alteration |
| sarc_mskcc | PT34DD     | AMP (driver)  | AMP (driver)  | no alteration | no alteration |
| sarc_mskcc | PT35DD     | AMP (driver)  | AMP (driver)  | AMP (driver)  | no alteration |
| sarc_mskcc | PT36DD     | AMP (driver)  | AMP (driver)  | no alteration | no alteration |
| sarc_mskcc | PT37DD     | AMP (driver)  | AMP (driver)  | no alteration | no alteration |
| sarc_mskcc | PT38DD     | AMP (driver)  | AMP (driver)  | no alteration | no alteration |
| sarc_mskcc | PT39DD     | AMP (driver)  | AMP (driver)  | AMP (driver)  | no alteration |
| sarc_mskcc | PT3DD      | AMP (driver)  | AMP (driver)  | no alteration | no alteration |
| sarc_mskcc | PT40DD     | AMP (driver)  | AMP (driver)  | AMP (driver)  | no alteration |
| sarc_mskcc | PT41DD     | AMP (driver)  | AMP (driver)  | no alteration | no alteration |
| sarc_mskcc | PT42DD     | AMP (driver)  | AMP (driver)  | AMP (driver)  | no alteration |
| sarc_mskcc | PT43DD     | AMP (driver)  | AMP (driver)  | no alteration | no alteration |
| sarc_mskcc | PT44DD     | AMP (driver)  | AMP (driver)  | AMP (driver)  | no alteration |



|            |        |               |               |               |               |
|------------|--------|---------------|---------------|---------------|---------------|
| sarc_mskcc | PT45DD | AMP (driver)  | AMP (driver)  | no alteration | no alteration |
| sarc_mskcc | PT46DD | AMP (driver)  | AMP (driver)  | AMP (driver)  | no alteration |
| sarc_mskcc | PT48DD | AMP (driver)  | AMP (driver)  | no alteration | no alteration |
| sarc_mskcc | PT49DD | AMP (driver)  | AMP (driver)  | no alteration | no alteration |
| sarc_mskcc | PT4DD  | AMP (driver)  | AMP (driver)  | AMP (driver)  | no alteration |
| sarc_mskcc | PT50DD | AMP (driver)  | AMP (driver)  | no alteration | no alteration |
| sarc_mskcc | PT5DD  | AMP (driver)  | AMP (driver)  | no alteration | no alteration |
| sarc_mskcc | PT6DD  | AMP (driver)  | AMP (driver)  | AMP (driver)  | no alteration |
| sarc_mskcc | PT7DD  | AMP (driver)  | AMP (driver)  | no alteration | no alteration |
| sarc_mskcc | PT8DD  | AMP (driver)  | AMP (driver)  | no alteration | no alteration |
| sarc_mskcc | PT9DD  | AMP (driver)  | AMP (driver)  | no alteration | no alteration |
| sarc_mskcc | PT20DD | no alteration | no alteration | no alteration | no alteration |
| sarc_mskcc | PT21DD | no alteration | no alteration | no alteration | no alteration |
| sarc_mskcc | PT24DD | no alteration | no alteration | no alteration | no alteration |
| sarc_mskcc | PT47DD | no alteration | no alteration | no alteration | no alteration |

**Table S14:** KEGG Hedgehog pathway Gene Set (hsa04340)

<https://www.gsea->

[msigdb.org/gsea/msigdb/human/geneset/KEGG\\_HEDGEHOG\\_SIGNALING\\_PATHWAY.html?keywords=hedgehog](https://www.gsea-msigdb.org/gsea/msigdb/human/geneset/KEGG_HEDGEHOG_SIGNALING_PATHWAY.html?keywords=hedgehog)

| Gene     | Description                                                                                                                                                                                                                                                                                                                                                                                                                                                                                                                                                                                                            |
|----------|------------------------------------------------------------------------------------------------------------------------------------------------------------------------------------------------------------------------------------------------------------------------------------------------------------------------------------------------------------------------------------------------------------------------------------------------------------------------------------------------------------------------------------------------------------------------------------------------------------------------|
| BMP2     | Bone morphogenetic protein 2; Induces cartilage and bone formation. Stimulates the differentiation of myoblasts into osteoblasts via the EIF2AK3-EIF2A- ATF4 pathway. BMP2 activation of EIF2AK3 stimulates phosphorylation of EIF2A which leads to increased expression of ATF4 which plays a central role in osteoblast differentiation. In addition stimulates TMEM119, which upregulates the expression of ATF4; Belongs to the TGF-beta family                                                                                                                                                                    |
| BMP4     | Bone morphogenetic protein 4; Induces cartilage and bone formation. Also act in mesoderm induction, tooth development, limb formation and fracture repair. Acts in concert with PTHLH/PTHRP to stimulate ductal outgrowth during embryonic mammary development and to inhibit hair follicle induction (By similarity); Bone morphogenetic proteins                                                                                                                                                                                                                                                                     |
| BMP5     | Bone morphogenetic protein 5; Induces cartilage and bone formation; Bone morphogenetic proteins                                                                                                                                                                                                                                                                                                                                                                                                                                                                                                                        |
| BMP6     | Bone morphogenetic protein 6; Induces cartilage and bone formation; Bone morphogenetic proteins                                                                                                                                                                                                                                                                                                                                                                                                                                                                                                                        |
| BMP7     | Bone morphogenetic protein 7; Induces cartilage and bone formation. May be the osteoinductive factor responsible for the phenomenon of epithelial osteogenesis. Plays a role in calcium regulation and bone homeostasis; Bone morphogenetic proteins                                                                                                                                                                                                                                                                                                                                                                   |
| BMP8A    | Bone morphogenetic protein 8A; Induces cartilage and bone formation. May be the osteoinductive factor responsible for the phenomenon of epithelial osteogenesis. Plays a role in calcium regulation and bone homeostasis (By similarity). Signaling protein involved in regulation of thermogenesis and energy balance. Proposed to increase the peripheral response of brown adipose tissue (BAT) to adrenergic stimulation while acting centrally in the hypothalamus to increase sympathetic output to BAT; Bone morphogenetic proteins                                                                             |
| BMP8B    | Bone morphogenetic protein 8B; Induces cartilage and bone formation. May be the osteoinductive factor responsible for the phenomenon of epithelial osteogenesis. Plays a role in calcium regulation and bone homeostasis (By similarity); Belongs to the TGF-beta family                                                                                                                                                                                                                                                                                                                                               |
| BTRC     | F-box/WD repeat-containing protein 1A; Substrate recognition component of a SCF (SKP1-CUL1-F- box protein) E3 ubiquitin-protein ligase complex which mediates the ubiquitination and subsequent proteasomal degradation of target proteins. Recognizes and binds to phosphorylated target proteins. SCF(BTRC) mediates the ubiquitination of CTNNB1 and participates in Wnt signaling. SCF(BTRC) mediates the ubiquitination of NFKBIA, NFKBIB and NFKBIE; the degradation frees the associated NFKB1 to translocate into the nucleus and to activate transcription. Ubiquitination of NFKBIA occurs at 'Lys- 21 [...] |
| CSNK1A1  | Casein kinase I isoform alpha; Casein kinases are operationally defined by their preferential utilization of acidic proteins such as caseins as substrates. It can phosphorylate a large number of proteins. Participates in Wnt signaling. Phosphorylates CTNNB1 at 'Ser-45'. May phosphorylate PER1 and PER2. May play a role in segregating chromosomes during mitosis. May play a role in keratin cytoskeleton disassembly and thereby, it may regulate epithelial cell migration                                                                                                                                  |
| CSNK1A1L | Casein kinase I isoform alpha-like; Casein kinases are operationally defined by their preferential utilization of acidic proteins such as caseins as substrates. It can phosphorylate a large number of proteins. Participates in Wnt signaling (By similarity)                                                                                                                                                                                                                                                                                                                                                        |
| CSNK1D   | Casein kinase I isoform delta; Essential serine/threonine-protein kinase that regulates diverse cellular growth and survival processes including Wnt signaling, DNA repair and circadian rhythms. It can phosphorylate a large number of proteins. Casein kinases are operationally defined by their preferential utilization of acidic proteins such as caseins as substrates. Phosphorylates connexin-43/GJA1, MAP1A, SNAPIN, MAPT/TAU, TOP2A, DCK, HIF1A, EIF6, p53/TP53, DVL2, DVL3, ESR1, AIB1/NCOA3, DNMT1, PKD2, YAP1, PER1 and PER2. Central component of the circadian clock. In balance with PP1, dete [...] |
| CSNK1E   | Casein kinase I isoform epsilon; Casein kinases are operationally defined by their preferential utilization of acidic proteins such as caseins as substrates. Can phosphorylate a large number of proteins. Participates in Wnt signaling. Phosphorylates DVL1 and DVL2. Central component of the circadian clock. In balance with PP1, determines the circadian period length, through the regulation of the speed and rhythmicity of PER1 and PER2 phosphorylation. Controls PER1 and PER2 nuclear transport and degradation. Inhibits cytokine-induced granuloytic differentiation                                  |
| CSNK1G1  | Casein kinase I isoform gamma-1; Serine/threonine-protein kinase. Casein kinases are operationally defined by their preferential utilization of acidic proteins such as caseins as substrates. It can phosphorylate a large number of proteins. Participates in Wnt signaling. Regulates fast synaptic transmission mediated by glutamate (By similarity). Phosphorylates CLSPN                                                                                                                                                                                                                                        |

|         |                                                                                                                                                                                                                                                                                                                                                                                                                                                                                                                                                                                                                        |
|---------|------------------------------------------------------------------------------------------------------------------------------------------------------------------------------------------------------------------------------------------------------------------------------------------------------------------------------------------------------------------------------------------------------------------------------------------------------------------------------------------------------------------------------------------------------------------------------------------------------------------------|
| CSNK1G2 | Casein kinase I isoform gamma-2; Serine/threonine-protein kinase. Casein kinases are operationally defined by their preferential utilization of acidic proteins such as caseins as substrates. It can phosphorylate a large number of proteins. Participates in Wnt signaling. Phosphorylates COL4A3BP/CERT, MTA1 and SMAD3. Involved in brain development and vesicular trafficking and neurotransmitter releasing from small synaptic vesicles. Regulates fast synaptic transmission mediated by glutamate. SMAD3 phosphorylation promotes its ligand-dependent ubiquitination and subsequent proteasome degra [...] |
| CSNK1G3 | Casein kinase I isoform gamma-3; Serine/threonine-protein kinase. Casein kinases are operationally defined by their preferential utilization of acidic proteins such as caseins as substrates. It can phosphorylate a large number of proteins. Participates in Wnt signaling. Regulates fast synaptic transmission mediated by glutamate (By similarity)                                                                                                                                                                                                                                                              |
| DHH     | Desert hedgehog protein; Intercellular signal essential for a variety of patterning events during development. May function as a spermatocyte survival factor in the testes. Essential for testes development; Hedgehog signaling molecule family                                                                                                                                                                                                                                                                                                                                                                      |
| FBXW11  | F-box/WD repeat-containing protein 11; Substrate recognition component of a SCF (SKP1-CUL1-F-box protein) E3 ubiquitin-protein ligase complex which mediates the ubiquitination and subsequent proteasomal degradation of target proteins. Probably recognizes and binds to phosphorylated target proteins. SCF(FBXW11) mediates the ubiquitination of phosphorylated CTNNB1 and participates in Wnt signaling. SCF(FBXW11) mediates the ubiquitination of phosphorylated NFKB1A, which degradation frees the associated NFKB1 to translocate into the nucleus and to activate transcription. SCF(FBXW11) media [...]  |
| GAS1    | Growth arrest-specific protein 1; Specific growth arrest protein involved in growth suppression. Blocks entry to S phase. Prevents cycling of normal and transformed cells                                                                                                                                                                                                                                                                                                                                                                                                                                             |
| GLI1    | Zinc finger protein GLI1; Acts as a transcriptional activator. Binds to the DNA consensus sequence 5'-GACCACCCA-3'. May regulate the transcription of specific genes during normal development. May play a role in craniofacial development and digital development, as well as development of the central nervous system and gastrointestinal tract. Mediates SHH signaling. Plays a role in cell proliferation and differentiation via its role in SHH signaling (Probable); Zinc fingers C2H2-type                                                                                                                  |
| GLI2    | Zinc finger protein GLI2; Functions as transcription regulator in the hedgehog (Hh) pathway. Functions as transcriptional activator. May also function as transcriptional repressor (By similarity). Requires STK36 for full transcriptional activator activity. Required for normal embryonic development; Zinc fingers C2H2-type                                                                                                                                                                                                                                                                                     |
| GLI3    | Transcriptional activator GLI3; Has a dual function as a transcriptional activator and a repressor of the sonic hedgehog (Shh) pathway, and plays a role in limb development. The full-length GLI3 form (GLI3FL) after phosphorylation and nuclear translocation, acts as an activator (GLI3A) while GLI3R, its C-terminally truncated form, acts as a repressor. A proper balance between the GLI3 activator and the repressor GLI3R, rather than the repressor gradient itself or the activator/repressor ratio gradient, specifies limb digit number and identity. In concert with TRPS1, plays a role in reg [...] |
| GSK3B   | Glycogen synthase kinase-3 beta; Constitutively active protein kinase that acts as a negative regulator in the hormonal control of glucose homeostasis, Wnt signaling and regulation of transcription factors and microtubules, by phosphorylating and inactivating glycogen synthase (GYS1 or GYS2), EIF2B, CTNNB1/beta-catenin, APC, AXIN1, DPYSL2/CRMP2, JUN, NFATC1/NFATC, MAPT/TAU and MACF1. Requires primed phosphorylation of the majority of its substrates. In skeletal muscle, contributes to insulin regulation of glycogen synthesis by phosphorylating and inhibiting GYS1 activity and hence glyc [...] |
| HHIP    | Hedgehog-interacting protein; Modulates hedgehog signaling in several cell types including brain and lung through direct interaction with members of the hedgehog family                                                                                                                                                                                                                                                                                                                                                                                                                                               |
| IHH     | Indian hedgehog protein; Intercellular signal essential for a variety of patterning events during development. Binds to the patched (PTC) receptor, which functions in association with smoothened (SMO), to activate the transcription of target genes. Implicated in endochondral ossification: may regulate the balance between growth and ossification of the developing bones. Induces the expression of parathyroid hormone-related protein (PTHrP) (By similarity); Belongs to the hedgehog family                                                                                                              |
| LRP2    | Low-density lipoprotein receptor-related protein 2; Multiligand endocytic receptor (By similarity). Acts together with CUBN to mediate endocytosis of high-density lipoproteins (By similarity). Mediates receptor-mediated uptake of polybasic drugs such as aprotinin, aminoglycosides and polymyxin B (By similarity). In the kidney, mediates the tubular uptake and clearance of leptin (By similarity). Also mediates transport of leptin across the blood-brain barrier through endocytosis at the choroid plexus epithelium (By similarity). Endocytosis of leptin in neuronal cells is required for hyp [...] |
| PRKACA  | cAMP-dependent protein kinase catalytic subunit alpha; Phosphorylates a large number of substrates in the cytoplasm and the nucleus. Regulates the abundance of compartmentalized pools of its regulatory subunits through phosphorylation of PJA2 which binds and ubiquitinates these subunits, leading to their subsequent proteolysis. Phosphorylates CDC25B, ABL1, NFKB1, CLDN3, PSMC5/RPT6, PJA2, RYR2, RORA and VASP. RORA is activated                                                                                                                                                                          |

|        |                                                                                                                                                                                                                                                                                                                                                                                                                                                                                                                                                                                                                         |
|--------|-------------------------------------------------------------------------------------------------------------------------------------------------------------------------------------------------------------------------------------------------------------------------------------------------------------------------------------------------------------------------------------------------------------------------------------------------------------------------------------------------------------------------------------------------------------------------------------------------------------------------|
|        | by phosphorylation. Required for glucose- mediated adipogenic differentiation increase and osteogenic differentiation inhibition from osteoblasts. Involved in the [...]                                                                                                                                                                                                                                                                                                                                                                                                                                                |
| PRKACB | cAMP-dependent protein kinase catalytic subunit beta; Mediates cAMP-dependent signaling triggered by receptor binding to GPCRs. PKA activation regulates diverse cellular processes such as cell proliferation, the cell cycle, differentiation and regulation of microtubule dynamics, chromatin condensation and decondensation, nuclear envelope disassembly and reassembly, as well as regulation of intracellular transport mechanisms and ion flux. Regulates the abundance of compartmentalized pools of its regulatory subunits through phosphorylation of PJA2 which binds and ubiquitinates these subu [...]  |
| PRKACG | cAMP-dependent protein kinase catalytic subunit gamma; Phosphorylates a large number of substrates in the cytoplasm and the nucleus; Belongs to the protein kinase superfamily. AGC Ser/Thr protein kinase family. cAMP subfamily                                                                                                                                                                                                                                                                                                                                                                                       |
| PRKX   | cAMP-dependent protein kinase catalytic subunit PRKX; Serine/threonine protein kinase regulated by and mediating cAMP signaling in cells. Acts through phosphorylation of downstream targets that may include CREB, SMAD6 and PKD1 and has multiple functions in cellular differentiation and epithelial morphogenesis. Regulates myeloid cell differentiation through SMAD6 phosphorylation. Involved in nephrogenesis by stimulating renal epithelial cell migration and tubulogenesis. Also involved in angiogenesis through stimulation of endothelial cell proliferation, migration and vascular-like struc [...]  |
| PTCH1  | Protein patched homolog 1; Acts as a receptor for sonic hedgehog (SHH), indian hedgehog (IHH) and desert hedgehog (DHH). Associates with the smoothened protein (SMO) to transduce the hedgehog's proteins signal. Seems to have a tumor suppressor function, as inactivation of this protein is probably a necessary, if not sufficient step for tumorigenesis; Belongs to the patched family                                                                                                                                                                                                                          |
| PTCH2  | Protein patched homolog 2; May have a role in epidermal development. May act as a receptor for Sonic hedgehog (SHH)                                                                                                                                                                                                                                                                                                                                                                                                                                                                                                     |
| RAB23  | RAB23, member RAS oncogene family; Ras-related protein Rab-23; The small GTPases Rab are key regulators of intracellular membrane trafficking, from the formation of transport vesicles to their fusion with membranes. Rabs cycle between an inactive GDP-bound form and an active GTP-bound form that is able to recruit to membranes different set of downstream effectors directly responsible for vesicle formation, movement, tethering and fusion. Together with SUFU, prevents nuclear import of GLI1, and thereby inhibits GLI1 transcription factor activity. Regulates GLI1 in differentiating chondr [...]  |
| SHH    | Sonic hedgehog protein; Sonic hedgehog protein: The C-terminal part of the sonic hedgehog protein precursor displays an autoproteolysis and a cholesterol transferase activity (By similarity). Both activities result in the cleavage of the full-length protein into two parts (ShhN and ShhC) followed by the covalent attachment of a cholesterol moiety to the C-terminal of the newly generated ShhN (By similarity). Both activities occur in the reticulum endoplasmic (By similarity). Once cleaved, ShhC is degraded in the endoplasmic reticulum (By similarity); Hedgehog signaling molecule family         |
| SMO    | Smoothened, frizzled class receptor; Smoothened homolog; G protein-coupled receptor that probably associates with the patched protein (PTCH) to transduce the hedgehog's proteins signal. Binding of sonic hedgehog (SHH) to its receptor patched is thought to prevent normal inhibition by patched of smoothened (SMO). Required for the accumulation of KIF7, GLI2 and GLI3 in the cilia. Interacts with DLG5 at the ciliary base to induce the accumulation of KIF7 and GLI2 at the ciliary tip for GLI2 activation (By similarity)                                                                                 |
| STK36  | Serine/threonine-protein kinase 36; Serine/threonine protein kinase which plays an important role in the sonic hedgehog (Shh) pathway by regulating the activity of GLI transcription factors. Controls the activity of the transcriptional regulators GLI1, GLI2 and GLI3 by opposing the effect of SUFU and promoting their nuclear localization. GLI2 requires an additional function of STK36 to become transcriptionally active, but the enzyme does not need to possess an active kinase catalytic site for this to occur. Required for postnatal development, possibly by regulating the homeostasis of c [...]  |
| SUFU   | Suppressor of fused homolog; Negative regulator in the hedgehog signaling pathway. Down-regulates GLI1-mediated transactivation of target genes. Down- regulates GLI2-mediated transactivation of target genes. Part of a corepressor complex that acts on DNA-bound GLI1. May also act by linking GLI1 to BTRC and thereby targeting GLI1 to degradation by the proteasome. Sequesters GLI1, GLI2 and GLI3 in the cytoplasm, this effect is overcome by binding of STK36 to both SUFU and a GLI protein. Negative regulator of beta- catenin signaling. Regulates the formation of either the repressor form (G [...]) |
| WNT1   | Wingless-type mmtv integration site family, member 1; Proto-oncogene Wnt-1; Ligand for members of the frizzled family of seven transmembrane receptors. Acts in the canonical Wnt signaling pathway by promoting beta-catenin-dependent transcriptional activation. In some developmental processes, is also a ligand for the coreceptor RYK, thus triggering Wnt signaling. Probable developmental protein. May be a signaling molecule important in CNS development. Is likely to signal over only few cell diameters. Has a role in osteoblast function and bone development                                         |

|        |                                                                                                                                                                                                                                                                                                                                                                                                                                                                                                                                                                                                                        |
|--------|------------------------------------------------------------------------------------------------------------------------------------------------------------------------------------------------------------------------------------------------------------------------------------------------------------------------------------------------------------------------------------------------------------------------------------------------------------------------------------------------------------------------------------------------------------------------------------------------------------------------|
| WNT10A | Wingless-type mmtv integration site family, member 10; Protein Wnt-10a; Ligand for members of the frizzled family of seven transmembrane receptors. Probable developmental protein. May be a signaling molecule important in CNS development. Is likely to signal over only few cell diameters; Belongs to the Wnt family                                                                                                                                                                                                                                                                                              |
| WNT10B | Wingless-type mmtv integration site family, member 10; Protein Wnt-10b; Member of the Wnt ligand gene family that encodes for secreted proteins, which activate the Wnt signaling cascade. Specifically activates canonical Wnt/beta-catenin signaling and thus triggers beta-catenin/LEF/TCF-mediated transcriptional programs. Involved in signaling networks controlling stemness, pluripotency and cell fate decisions. Acts in the immune system, mammary gland, adipose tissue, bone and skin; Belongs to the Wnt family                                                                                         |
| WNT11  | Wingless-type mmtv integration site family, member 11; Protein Wnt-11; Ligand for members of the frizzled family of seven transmembrane receptors. Probable developmental protein. May be a signaling molecule which affects the development of discrete regions of tissues. Is likely to signal over only few cell diameters                                                                                                                                                                                                                                                                                          |
| WNT16  | Wingless-type mmtv integration site family, member 16; Protein Wnt-16; Ligand for members of the frizzled family of seven transmembrane receptors. Probable developmental protein. May be a signaling molecule which affects the development of discrete regions of tissues. Is likely to signal over only few cell diameters (By similarity)                                                                                                                                                                                                                                                                          |
| WNT2   | Wingless-type mmtv integration site family, member 2; Protein Wnt-2; Ligand for members of the frizzled family of seven transmembrane receptors. Probable developmental protein. May be a signaling molecule which affects the development of discrete regions of tissues. Is likely to signal over only few cell diameters; Belongs to the Wnt family                                                                                                                                                                                                                                                                 |
| WNT2B  | Wingless-type mmtv integration site family, member 2; Protein Wnt-2b; Ligand for members of the frizzled family of seven transmembrane receptors. Probable developmental protein. May be a signaling molecule which affects the development of discrete regions of tissues. Is likely to signal over only few cell diameters. May be involved in normal development or differentiation as well as in carcinogenesis                                                                                                                                                                                                    |
| WNT3   | Wingless-type mmtv integration site family, member 3; Proto-oncogene Wnt-3; Ligand for members of the frizzled family of seven transmembrane receptors. Wnt-3 and Wnt-3a play distinct roles in cell-cell signaling during morphogenesis of the developing neural tube (By similarity)                                                                                                                                                                                                                                                                                                                                 |
| WNT3A  | Wingless-type mmtv integration site family, member 3; Protein Wnt-3a; Ligand for members of the frizzled family of seven transmembrane receptors. Wnt-3 and Wnt-3a play distinct roles in cell-cell signaling during morphogenesis of the developing neural tube; Endogenous ligands                                                                                                                                                                                                                                                                                                                                   |
| WNT4   | Wingless-type mmtv integration site family, member 4; Protein Wnt-4; Ligand for members of the frizzled family of seven transmembrane receptors. Probable developmental protein. May be a signaling molecule which affects the development of discrete regions of tissues. Is likely to signal over only few cell diameters (By similarity). Overexpression may be associated with abnormal proliferation in human breast tissue; Endogenous ligands                                                                                                                                                                   |
| WNT5A  | Wingless-type mmtv integration site family, member 5; Protein Wnt-5a; Ligand for members of the frizzled family of seven transmembrane receptors. Can activate or inhibit canonical Wnt signaling, depending on receptor context. In the presence of FZD4, activates beta-catenin signaling. In the presence of ROR2, inhibits the canonical Wnt pathway by promoting beta-catenin degradation through a GSK3-independent pathway which involves down-regulation of beta-catenin-induced reporter gene expression. Suppression of the canonical pathway allows chondrogenesis to occur and inhibits tumor format [...] |
| WNT5B  | Wingless-type mmtv integration site family, member 5; Protein Wnt-5b; Ligand for members of the frizzled family of seven transmembrane receptors. Probable developmental protein. May be a signaling molecule which affects the development of discrete regions of tissues. Is likely to signal over only few cell diameters (By similarity); Belongs to the Wnt family                                                                                                                                                                                                                                                |
| WNT6   | Wingless-type mmtv integration site family, member 6; Protein Wnt-6; Ligand for members of the frizzled family of seven transmembrane receptors. Probable developmental protein. May be a signaling molecule which affects the development of discrete regions of tissues. Is likely to signal over only few cell diameters. Together with CAV1 may promote chemoresistance of gastric cancer cells to DNA-damaging anthracycline drugs through the activation of the canonical Wnt receptor signaling pathway                                                                                                         |
| WNT7A  | Wingless-type mmtv integration site family, member 7; Protein Wnt-7a; Ligand for members of the frizzled family of seven transmembrane receptors. Probable developmental protein. Signaling by Wnt-7a allows sexually dimorphic development of the mullerian ducts (By similarity)                                                                                                                                                                                                                                                                                                                                     |
| WNT7B  | Wingless-type mmtv integration site family, member 7; Protein Wnt-7b; Ligand for members of the frizzled family of seven transmembrane receptors. Probable developmental protein. May be a signaling molecule which affects the development of discrete regions of tissues. Is likely to signal over only few cell diameters (By similarity); Endogenous ligands                                                                                                                                                                                                                                                       |
| WNT8A  | Wingless-type mmtv integration site family, member 8; Protein Wnt-8a; Ligand for members of the frizzled family of seven transmembrane receptors. May play an important role in the development and differentiation of certain forebrain structures, notably the hippocampus                                                                                                                                                                                                                                                                                                                                           |

|       |                                                                                                                                                                                                                                                                                                                                                                                                                                                                                                                                                                                                                        |
|-------|------------------------------------------------------------------------------------------------------------------------------------------------------------------------------------------------------------------------------------------------------------------------------------------------------------------------------------------------------------------------------------------------------------------------------------------------------------------------------------------------------------------------------------------------------------------------------------------------------------------------|
| WNT8B | Wingless-type mmtv integration site family, member 8; Protein Wnt-8b; Ligand for members of the frizzled family of seven transmembrane receptors. May play an important role in the development and differentiation of certain forebrain structures, notably the hippocampus                                                                                                                                                                                                                                                                                                                                           |
| WNT9A | Wingless-type mmtv integration site family, member 9; Protein Wnt-9a; Ligand for members of the frizzled family of seven transmembrane receptors. Probable developmental protein. May be a signaling molecule which affects the development of discrete regions of tissues. Is likely to signal over only few cell diameters (By similarity)                                                                                                                                                                                                                                                                           |
| WNT9B | Wingless-type mmtv integration site family, member 9; Protein Wnt-9b; Ligand for members of the frizzled family of seven transmembrane receptors. Probable developmental protein. May be a signaling molecule which affects the development of discrete regions of tissues. Is likely to signal over only few cell diameters (By similarity)                                                                                                                                                                                                                                                                           |
| ZIC2  | Zinc finger protein ZIC 2; Acts as a transcriptional activator or repressor. Plays important roles in the early stage of organogenesis of the CNS. Activates the transcription of the serotonin transporter SERT in uncrossed ipsilateral retinal ganglion cells (iRGCs) to refine eye-specific projections in primary visual targets. Its transcriptional activity is repressed by MDFIC. Involved in the formation of the ipsilateral retinal projection at the optic chiasm midline. Drives the expression of EPHB1 on ipsilaterally projecting growth cones. Binds to the minimal GLI-consensus sequence 5'- [...] |

**Supplemental Table S15:** Gene Set GCNP\_SHH\_UP\_EARLY.V1\_UP
[https://www.gsea-msigdb.org/gsea/msigdb/cards/GCNP\\_SHH\\_UP\\_EARLY.V1\\_UP](https://www.gsea-msigdb.org/gsea/msigdb/cards/GCNP_SHH_UP_EARLY.V1_UP)

| Source Id     | NCBI (Entrez) Gene Id | Gene Symbol | Gene Description                     |
|---------------|-----------------------|-------------|--------------------------------------|
| 0610005C13Rik |                       |             |                                      |
| 1100001G20Rik | 645638                | WFDC21P     | WAP four-disulfide core domain 2...  |
| 1190002H23Rik | 28984                 | RGCC        | regulator of cell cycle [Source:...  |
| 1810030O07Rik | 159013                | CXorf38     | chromosome X open reading frame ...  |
| 2410003P15Rik | 55245                 | UQCC1       | ubiquinol-cytochrome c reductase...  |
| 2510039O18Rik | 90231                 | KIAA2013    | KIAA2013 [Source:HGNC Symbol;Acc...  |
| 2610003J06Rik | 339123                | JMJD8       | jumonji domain containing 8 [Sou...  |
| 2610201A13Rik |                       |             |                                      |
| 2810453I06Rik | 84792                 | FAM220A     | family with sequence similarity ...  |
| 3300001P08Rik | 51747                 | LUC7L3      | LUC7 like 3 pre-mRNA splicing fa...  |
| 4732407F15Rik | 353288                | KRT26       | keratin 26 [Source:HGNC Symbol;A...  |
| 4930517K11Rik | 116832                | RPL39L      | ribosomal protein L39 like [Sour...  |
| 4933426K21Rik | 57494                 | RIMKLB      | ribosomal modification protein r...  |
| 5830411E10Rik | 64859                 | NABP1       | nucleic acid binding protein 1 [...] |
| AA408278      | 79939                 | SLC35E1     | solute carrier family 35 member ...  |
| ABCB10        | 23456                 | ABCB10      | ATP binding cassette subfamily B...  |
| ADAMTS1       | 9510                  | ADAMTS1     | ADAM metalloproteinase with throm... |
| ADCY6         | 112                   | ADCY6       | adenylate cyclase 6 [Source:HGNC...  |
| AFF4          | 27125                 | AFF4        | ALF transcription elongation fac...  |
| AI931714      | 90826                 | PRMT9       | protein arginine methyltransfera...  |
| ANKRD13C      | 81573                 | ANKRD13C    | ankyrin repeat domain 13C [Sourc...  |
| ANLN          | 54443                 | ANLN        | anillin, actin binding protein [...] |
| APRIN         | 23047                 | PDS5B       | PDS5 cohesin associated factor B...  |
| ARHGAP8       | 23779                 | ARHGAP8     | Rho GTPase activating protein 8 ...  |
| ARHGEF1       | 9138                  | ARHGEF1     | Rho guanine nucleotide exchange ...  |
| ARL5A         | 26225                 | ARL5A       | ADP ribosylation factor like GTP...  |
| ARL6IP2       | 64225                 | ATL2        | atlastin GTPase 2 [Source:HGNC S...  |

|                       |       |         |                                        |
|-----------------------|-------|---------|----------------------------------------|
| ATF1                  | 466   | ATF1    | activating transcription factor ...    |
| AURKA                 | 6790  | AURKA   | aurora kinase A<br>[Source:HGNC Sym... |
| AURKB                 | 9212  | AURKB   | aurora kinase B<br>[Source:HGNC Sym... |
| AZIN1                 | 51582 | AZIN1   | antizyme inhibitor 1<br>[Source:HGN... |
| B930007L02Rik         | 9730  | DCAF1   | DDB1 and CUL4 associated factor ...    |
| BCKDHA                | 593   | BCKDHA  | branched chain keto acid dehydro...    |
| BEXL1                 | 56271 | BEX4    | brain expressed X-linked 4<br>[Sour... |
| C330006A16Rik         | 90120 | TMEM250 | transmembrane protein 250<br>[Sourc... |
| C330011F01Rik // / 64 |       |         |                                        |
| C76434                |       |         |                                        |
| C77808                |       |         |                                        |
| C80865                |       |         |                                        |
| CCDC99                | 54908 | SPDL1   | spindle apparatus coiled-coil pr...    |
| CCNB1-RS1 /// LO C231 |       |         |                                        |
| CCNJ                  | 54619 | CCNJ    | cyclin J [Source:HGNC Symbol;Acc...    |
| CD276                 | 80381 | CD276   | CD276 molecule<br>[Source:HGNC Symb... |
| CD2BP2                | 10421 | CD2BP2  | CD2 cytoplasmic tail binding pro...    |
| CD55                  | 1604  | CD55    | CD55 molecule (Cromer blood grou...    |
| CDC23                 | 8697  | CDC23   | cell division cycle 23<br>[Source:H... |
| CHEK1                 | 1111  | CHEK1   | checkpoint kinase 1<br>[Source:HGNC... |
| CKS2                  | 1164  | CKS2    | CDC28 protein kinase regulatory ...    |
| CLCN6                 | 1185  | CLCN6   | chloride voltage-gated channel 6...    |
| CNOT2                 | 4848  | CNOT2   | CCR4-NOT transcription complex s...    |
| COX7B                 | 1349  | COX7B   | cytochrome c oxidase subunit 7B ...    |
| CR2                   | 1380  | CR2     | complement C3d receptor 2<br>[Sourc... |
| CSF1                  | 1435  | CSF1    | colony stimulating factor 1<br>[Sou... |
| Cyp2c29               | 1557  | CYP2C19 | cytochrome P450 family 2 subfami...    |
| D11WSU99E             |       |         |                                        |
| D17H6S56E-5           |       |         |                                        |
| D3Wsu161e             | 51574 | LARP7   | La ribonucleoprotein 7, transcri...    |
| D7ERTD183E            |       |         |                                        |
| D930048N14Rik         |       |         |                                        |



|               |        |          |                                         |
|---------------|--------|----------|-----------------------------------------|
| DARS          | 1615   | DARS1    | aspartyl-tRNA synthetase 1<br>[Sour...  |
| DCPS          | 28960  | DCPS     | decapping enzyme, scavenger<br>[Sou...  |
| DHFR          | 1719   | DHFR     | dihydrofolate reductase<br>[Source:...  |
| DHODH         | 1723   | DHODH    | dihydroorotate dehydrogenase<br>(qu...  |
| DIO1          | 1733   | DIO1     | iodothyronine deiodinase 1<br>[Sour...  |
| DNAJC3        | 5611   | DNAJC3   | DnaJ heat shock protein family<br>(...  |
| DOLPP1        | 57171  | DOLPP1   | dolichyldiphosphatase 1<br>[Source:...  |
| E230006M18Rik |        |          |                                         |
| E2F3          | 1871   | E2F3     | E2F transcription factor 3<br>[Sour...  |
| E2F8          | 79733  | E2F8     | E2F transcription factor 8<br>[Sour...  |
| ELOVL2        | 54898  | ELOVL2   | ELOVL fatty acid elongase 2<br>[Sou...  |
| Epb4.114b     | 54566  | EPB41L4B | erythrocyte membrane protein<br>ban...  |
| FBXO45        | 200933 | FBXO45   | F-box protein 45<br>[Source:HGNC Sy...  |
| FCGRT         | 2217   | FCGRT    | Fc gamma receptor and<br>transporte...  |
| FEN1          | 2237   | FEN1     | flap structure-specific<br>endonucl...  |
| FIP1L1        | 81608  | FIP1L1   | factor interacting with<br>PAPOLA a...  |
| FNBP4         | 23360  | FNBP4    | formin binding protein 4<br>[Source...  |
| FNTB          | 2342   | FNTB     | farnesyltransferase, CAAX<br>box, b...  |
| FOSL1         | 8061   | FOSL1    | FOS like 1, AP-1 transcription<br>f...  |
| FOXK1         | 221937 | FOXK1    | forkhead box K1<br>[Source:HGNC Sym...  |
| FTSJ3         | 117246 | FTSJ3    | FtsJ RNA 2'-O-<br>methyltransferase ... |
| FUSIP1        | 10772  | SRSF10   | serine and arginine rich<br>splicin...  |
| GGPS1         | 9453   | GGPS1    | geranylgeranyl diphosphate<br>synth...  |
| GNL3          | 26354  | GNL3     | G protein nucleolar 3<br>[Source:HG...  |
| GPATC2        | 55105  | GPATCH2  | G-patch domain containing 2<br>[Sou...  |
| GTF2H1        | 2965   | GTF2H1   | general transcription factor<br>IIH...  |
| H2-Q8         | 3136   | HLA-H    | major histocompatibility<br>complex...  |
| HDGFL1        | 154150 | HDGFL1   | HDGF like 1 [Source:HGNC<br>Symbol;...  |
| HMGCL         | 3155   | HMGCL    | 3-hydroxy-3-methylglutaryl-<br>CoA l... |

|                      |        |          |                                     |
|----------------------|--------|----------|-------------------------------------|
| ICAM5                | 7087   | ICAM5    | intercellular adhesion molecule ... |
| INTS7                | 25896  | INTS7    | integrator complex subunit 7 [So... |
| IRF5                 | 3663   | IRF5     | interferon regulatory factor 5 [... |
| IRF6                 | 3664   | IRF6     | interferon regulatory factor 6 [... |
| KBTD7                | 84078  | KBTD7    | kelch repeat and BTB domain cont... |
| KCNJ4                | 3761   | KCNJ4    | potassium inwardly rectifying ch... |
| KIF1A                | 547    | KIF1A    | kinesin family member 1A [Source... |
| KIF1B                | 23095  | KIF1B    | kinesin family member 1B [Source... |
| KIF4A                | 24137  | KIF4A    | kinesin family member 4A [Source... |
| KIFC1                | 3833   | KIFC1    | kinesin family member C1 [Source... |
| KPNA2 /// LOC670551  |        |          |                                     |
| KRT1-12              |        |          |                                     |
| KRTAP6-3             | 337968 | KRTAP6-3 | keratin associated protein 6-3 [... |
| LATS1                | 9113   | LATS1    | large tumor suppressor kinase 1 ... |
| LBR                  | 3930   | LBR      | lamin B receptor [Source:HGNC Sy... |
| LOC382653            | 28412  | IGHV3-66 | immunoglobulin heavy variable 3-... |
| LOC435970            | 7562   | ZNF708   | zinc finger protein 708 [Source:... |
| LOC435970 /// LOC668 |        |          |                                     |
| LOC541456            |        |          |                                     |
| LOXL2                | 4017   | LOXL2    | lysyl oxidase like 2 [Source:HGN... |
| LUC7L2               | 51631  | LUC7L2   | LUC7 like 2, pre-mRNA splicing f... |
| MAP4K3 /// LOC675560 |        |          |                                     |
| MAPK14               | 1432   | MAPK14   | mitogen-activated protein kinase... |
| MATR3                | 9782   | MATR3    | matrin 3 [Source:HGNC Symbol;Acc... |
| MBL2                 | 4153   | MBL2     | mannose binding lectin 2 [Source... |
| MBTD1                | 54799  | MBTD1    | mbt domain containing 1 [Source:... |
| MCM10                | 55388  | MCM10    | minichromosome maintenance 10 re... |
| MCM5                 | 4174   | MCM5     | minichromosome maintenance compl... |
| MCM6                 | 4175   | MCM6     | minichromosome maintenance compl... |
| MCPT4                |        |          |                                     |

|        |       |        |                                     |
|--------|-------|--------|-------------------------------------|
| MLLT10 | 8028  | MLLT10 | MLLT10 histone lysine methyltran... |
| MNAB   | 54542 | RC3H2  | ring finger and CCCH-type domain... |
| MP4    |       |        |                                     |
| MPDZ   | 8777  | MPDZ   | multiple PDZ domain crumbs cell ... |
| MRE11A | 4361  | MRE11  | MRE11 homolog, double strand bre... |
| MRPL50 | 54534 | MRPL50 | mitochondrial ribosomal protein ... |
| MRPL9  | 65005 | MRPL9  | mitochondrial ribosomal protein ... |
| MSH6   | 2956  | MSH6   | mutS homolog 6 [Source:HGNC Symb... |
| MT4    | 84560 | MT4    | metallothionein 4 [Source:HGNC S... |
| MTA1   | 9112  | MTA1   | metastasis associated 1 [Source:... |
| MYB    | 4602  | MYB    | MYB proto-oncogene, transcriptio... |
| MYT1L  | 23040 | MYT1L  | myelin transcription factor 1 li... |
| Man1a  | 4121  | MAN1A1 | mannosidase alpha class 1A membe... |
| Muc10  |       |        |                                     |
| NAP1L1 | 4673  | NAP1L1 | nucleosome assembly protein 1 li... |
| NCAM2  | 4685  | NCAM2  | neural cell adhesion molecule 2 ... |
| NEK9   | 91754 | NEK9   | NIMA related kinase 9 [Source:HG... |
| NR0B1  | 190   | NR0B1  | nuclear receptor subfamily 0 gro... |
| NTHL1  | 4913  | NTHL1  | nth like DNA glycosylase 1 [Sour... |
| NUP107 | 57122 | NUP107 | nucleoporin 107 [Source:HGNC Sym... |
| NVL    | 4931  | NVL    | nuclear VCP like [Source:HGNC Sy... |
| OVGP1  | 5016  | OVGP1  | oviductal glycoprotein 1 [Source... |
| OXNAD1 | 92106 | OXNAD1 | oxidoreductase NAD binding domai... |
| OXSM   | 54995 | OXSM   | 3-oxoacyl-ACP synthase, mitochon... |
| PARG   | 8505  | PARG   | poly(ADP-ribose) glycohydrolase ... |
| PHTF2  | 57157 | PHTF2  | putative homeodomain transcripti... |
| PLCG2  | 5336  | PLCG2  | phospholipase C gamma 2 [Source:... |
| POLA2  | 23649 | POLA2  | DNA polymerase alpha 2, accessor... |
| PPP1CB | 5500  | PPP1CB | protein phosphatase 1 catalytic ... |
| PRC1   | 9055  | PRC1   | protein regulator of cytokinesis... |

|                      |        |         |                                     |
|----------------------|--------|---------|-------------------------------------|
| PSMA4 /// LOC670627  |        |         |                                     |
| PUM2                 | 23369  | PUM2    | pumilio RNA binding family membe... |
| RBBP6                | 5930   | RBBP6   | RB binding protein 6, ubiquitin ... |
| RBM39                | 9584   | RBM39   | RNA binding motif protein 39 [So... |
| RETN                 | 56729  | RETN    | resistin [Source:HGNC Symbol;Acc... |
| RHPN2                | 85415  | RHPN2   | rhophilin Rho GTPase binding pro... |
| RNASEH2A /// LOC6334 |        |         |                                     |
| RNF103               | 7844   | RNF103  | ring finger protein 103 [Source:... |
| RNF12                | 51132  | RLIM    | ring finger protein, LIM domain ... |
| RPL10A /// LOC546651 |        |         |                                     |
| RPLP2 /// 2600001A11 |        |         |                                     |
| RRM1                 | 6240   | RRM1    | ribonucleotide reductase catalyt... |
| RSNL2                | 79745  | CLIP4   | CAP-Gly domain containing linker... |
| RUNX1T1              | 862    | RUNX1T1 | RUNX1 partner transcriptional co... |
| RYK                  | 6259   | RYK     | receptor like tyrosine kinase [S... |
| Reg1                 | 5967   | REG1A   | regenerating family member 1 alp... |
| SDC3                 | 9672   | SDC3    | syndecan 3 [Source:HGNC Symbol;A... |
| SEH1L                | 81929  | SEH1L   | SEH1 like nucleoporin [Source:HG... |
| SFRS1                | 6426   | SRSF1   | serine and arginine rich splicin... |
| SGOL1                | 151648 | SGO1    | shugoshin 1 [Source:HGNC Symbol;... |
| SHC1                 | 6464   | SHC1    | SHC adaptor protein 1 [Source:HG... |
| SHE                  | 126669 | SHE     | Src homology 2 domain containing... |
| SLC23A2              | 9962   | SLC23A2 | solute carrier family 23 member ... |
| SLC27A1              | 376497 | SLC27A1 | solute carrier family 27 member ... |
| SMC2                 | 10592  | SMC2    | structural maintenance of chromo... |
| SNAPC2               | 6618   | SNAPC2  | small nuclear RNA activating com... |
| SNORD22              | 9304   | SNORD22 | small nucleolar RNA, C/D box 22 ... |
| SOX10                | 6663   | SOX10   | SRY-box transcription factor 10 ... |
| STAG2                | 10735  | STAG2   | stromal antigen 2 [Source:HGNC S... |

|                     |       |         |                                     |
|---------------------|-------|---------|-------------------------------------|
| STAT5A              | 6776  | STAT5A  | signal transducer and activator ... |
| STRN3               | 29966 | STRN3   | striatin 3 [Source:HGNC Symbol;A... |
| STYX                | 6815  | STYX    | serine/threonine/tyrosine intera... |
| TBP                 | 6908  | TBP     | TATA-box binding protein [Source... |
| TIA1                | 7072  | TIA1    | TIA1 cytotoxic granule associate... |
| TINF2               | 26277 | TINF2   | TERF1 interacting nuclear factor... |
| TLOC1               | 7095  | SEC62   | SEC62 homolog, preprotein transl... |
| TMPRSS2             | 7113  | TMPRSS2 | transmembrane serine protease 2 ... |
| TNNC2               | 7125  | TNNC2   | troponin C2, fast skeletal type ... |
| TNPO1               | 3842  | TNPO1   | transportin 1 [Source:HGNC Symbo... |
| TNPO1 /// LOC634263 |       |         |                                     |
| TOP2A               | 7153  | TOP2A   | DNA topoisomerase II alpha [Sour... |
| TOP2B               | 7155  | TOP2B   | DNA topoisomerase II beta [Sourc... |
| TRAIP               | 10293 | TRAIP   | TRAF interacting protein [Source... |
| TSHB                | 7252  | TSHB    | thyroid stimulating hormone subu... |
| TYMS                | 7298  | TYMS    | thymidylate synthetase [Source:H... |
| UBE2T               | 29089 | UBE2T   | ubiquitin conjugating enzyme E2 ... |
| UPF3B               | 65109 | UPF3B   | UPF3B regulator of nonsense medi... |
| VPS4B               | 9525  | VPS4B   | vacuolar protein sorting 4 homol... |
| Vhlh                | 7428  | VHL     | von Hippel-Lindau tumor suppress... |
| XPO1                | 7514  | XPO1    | exportin 1 [Source:HGNC Symbol;A... |
| ZFP281              |       |         |                                     |
| ZZZ3                | 26009 | ZZZ3    | zinc finger ZZ-type containing 3... |

**Supplemental Table S16:** Gene Set GCNP\_SHH\_UP\_LATE.V1\_UP
[https://www.gsea-msigdb.org/gsea/msigdb/cards/GCNP\\_SHH\\_UP\\_LATE.V1\\_UP](https://www.gsea-msigdb.org/gsea/msigdb/cards/GCNP_SHH_UP_LATE.V1_UP)

| Source Id             | NCBI (Entrez) Gene Id | Gene Symbol | Gene Description                   |
|-----------------------|-----------------------|-------------|------------------------------------|
| 1190017O12Rik         | 54065                 | SMIM11      | small integral membrane protein... |
| 1500003O03Rik         | 11261                 | CHP1        | calcineurin like EF-hand protei... |
| 1810013D10Rik         | 389203                | SMIM20      | small integral membrane protein... |
| 2210419D22Rik         |                       |             |                                    |
| 2610012O22Rik         | 51154                 | MRT04       | MRT4 homolog, ribosome maturati... |
| 2610029G23Rik         | 51260                 | PBDC1       | polysaccharide biosynthesis dom... |
| 2610205E22Rik         | 28989                 | NTMT1       | N-terminal Xaa-Pro-Lys N-methyl... |
| 2810422B04Rik         | 55037                 | PTCD3       | pentatricopeptide repeat domain... |
| 3300001P08Rik         | 51747                 | LUC7L3      | LUC7 like 3 pre-mRNA splicing f... |
| A430005L14Rik         | 339448                | C1orf174    | chromosome 1 open reading frame... |
| A930012N16Rik         |                       |             |                                    |
| ABCE1                 | 6059                  | ABCE1       | ATP binding cassette subfamily ... |
| AI503316              | 3192                  | HNRNPU      | heterogeneous nuclear ribonucle... |
| ARIH1                 | 25820                 | ARIH1       | ariadne RBR E3 ubiquitin protei... |
| ARL5A                 | 26225                 | ARL5A       | ADP ribosylation factor like GT... |
| ASB3                  | 51130                 | ASB3        | ankyrin repeat and SOCS box con... |
| AURKA                 | 6790                  | AURKA       | aurora kinase A [Source:HGNC Sy... |
| AURKB                 | 9212                  | AURKB       | aurora kinase B [Source:HGNC Sy... |
| B930007L02Rik         | 9730                  | DCAF1       | DDB1 and CUL4 associated factor... |
| BC020002              | 54468                 | MIOS        | meiosis regulator for oocyte de... |
| BOK                   | 666                   | BOK         | BCL2 family apoptosis regulator... |
| C130065N10Rik         |                       |             |                                    |
| C79407                | 55320                 | MIS18BP1    | MIS18 binding protein 1 [Source... |
| CASD1                 | 64921                 | CASD1       | CAS1 domain containing 1 [Sourc... |
| CASP4                 | 837                   | CASP4       | caspase 4 [Source:HGNC Symbol;A... |
| CBX3 /// LOC629578 /  |                       |             |                                    |
| CCNB1-RS1 /// LO C231 |                       |             |                                    |

|               |        |        |                                     |
|---------------|--------|--------|-------------------------------------|
| CCND2         | 894    | CCND2  | cyclin D2 [Source:HGNC Symbol;A...  |
| CCR2          | 729230 | CCR2   | C-C motif chemokine receptor 2 ...  |
| CD5           | 921    | CD5    | CD5 molecule [Source:HGNC Symbo...  |
| CD59A         |        |        |                                     |
| CD6           | 923    | CD6    | CD6 molecule [Source:HGNC Symbo...  |
| CD80          | 941    | CD80   | CD80 molecule [Source:HGNC Symb...  |
| CDC25A        | 993    | CDC25A | cell division cycle 25A [Source...  |
| CDC25C        | 995    | CDC25C | cell division cycle 25C [Source...  |
| CDCA7         | 83879  | CDCA7  | cell division cycle associated ...  |
| CFDP1         | 10428  | CFDP1  | craniofacial development protei...  |
| CHEK1         | 1111   | CHEK1  | checkpoint kinase 1 [Source:HGN...  |
| CKS2          | 1164   | CKS2   | CDC28 protein kinase regulatory...  |
| CLCN5         | 1184   | CLCN5  | chloride voltage-gated channel ...  |
| CLIC4         | 25932  | CLIC4  | chloride intracellular channel ...  |
| COIL          | 8161   | COIL   | coilin [Source:HGNC Symbol;Acc:...  |
| COPB1         | 1315   | COPB1  | COPI coat complex subunit beta ...  |
| COX7B         | 1349   | COX7B  | cytochrome c oxidase subunit 7B...  |
| CREM          | 1390   | CREM   | cAMP responsive element modulat...  |
| CSPG2         | 1462   | VCAN   | versican [Source:HGNC Symbol;Ac...  |
| CUL4A         | 8451   | CUL4A  | cullin 4A [Source:HGNC Symbol;A...  |
| CYP4B1        | 1580   | CYP4B1 | cytochrome P450 family 4 subfam...  |
| Cdc2a         | 983    | CDK1   | cyclin dependent kinase 1 [Sour...  |
| D17H6S56E-5   |        |        |                                     |
| D3Wsu161e     | 51574  | LARP7  | La ribonucleoprotein 7, transcr...  |
| D530031C13Rik | 54454  | ATAD2B | ATPase family AAA domain contai...  |
| D9ERTD306E    |        |        |                                     |
| DCPP          |        |        |                                     |
| DDX39         | 10212  | DDX39A | DEx D-box helicase 39A [Source:H... |
| DDX3X         | 1654   | DDX3X  | DEAD-box helicase 3 X-linked [S...  |
| DES           | 1674   | DES    | desmin [Source:HGNC Symbol;Acc:...  |
| DIDO1         | 11083  | DIDO1  | death inducer-obliterator 1 [So...  |

|          |        |           |                                        |
|----------|--------|-----------|----------------------------------------|
| DLG7     | 9787   | DLGAP5    | DLG associated protein 5<br>[Sourc...  |
| DNM1L    | 10059  | DNM1L     | dynamin 1 like [Source:HGNC<br>Sym...  |
| E2F8     | 79733  | E2F8      | E2F transcription factor 8<br>[Sou...  |
| EIF2A    | 83939  | EIF2A     | eukaryotic translation initiati...     |
| EIF3S10  | 8661   | EIF3A     | eukaryotic translation initiati...     |
| ELAVL2   | 1993   | ELAVL2    | ELAV like RNA binding<br>protein 2...  |
| ELOVL2   | 54898  | ELOVL2    | ELOVL fatty acid elongase 2<br>[So...  |
| FAM60A   | 58516  | SINHCAF   | SIN3-HDAC complex<br>associated fa...  |
| FANCC    | 2176   | FANCC     | FA complementation group C<br>[Sou...  |
| FANCM    | 57697  | FANCM     | FA complementation group M<br>[Sou...  |
| FBXO11   | 80204  | FBXO11    | F-box protein 11<br>[Source:HGNC S...  |
| FMR1NB   | 158521 | FMR1NB    | FMR1 neighbor<br>[Source:HGNC Symb...  |
| FOXA1    | 3169   | FOXA1     | forkhead box A1<br>[Source:HGNC Sy...  |
| FRMD6    | 122786 | FRMD6     | FERM domain containing 6<br>[Sourc...  |
| FTSJ3    | 117246 | FTSJ3     | FtsJ RNA 2'-O-<br>methyltransferase... |
| FUSIP1   | 10772  | SRSF10    | serine and arginine rich<br>splici...  |
| GALNT3   | 2591   | GALNT3    | polypeptide N-<br>acetylgalactosami... |
| GART     | 2618   | GART      | phosphoribosylglycinamide<br>formy...  |
| GBP2     | 2634   | GBP2      | guanylate binding protein 2<br>[So...  |
| GFM2     | 84340  | GFM2      | GTP dependent ribosome<br>recyclin...  |
| GNL3     | 26354  | GNL3      | G protein nucleolar 3<br>[Source:H...  |
| HIGD1A   | 25994  | HIGD1A    | HIG1 hypoxia inducible<br>domain f...  |
| HNRPA3   | 10151  | HNRNPA3P1 | heterogeneous nuclear<br>ribonucle...  |
| HSD3B4   |        |           |                                        |
| HSPB2    | 3316   | HSPB2     | heat shock protein family B<br>(sm...  |
| IDH2     | 3418   | IDH2      | isocitrate dehydrogenase<br>(NADP(...  |
| IFNA11   |        |           |                                        |
| IGF2     | 3481   | IGF2      | insulin like growth factor 2<br>[S...  |
| INCENP   | 3619   | INCENP    | inner centromere protein<br>[Sourc...  |
| IVNS1ABP | 10625  | IVNS1ABP  | influenza virus NS1A binding<br>pr...  |



|                          |        |           |                                       |
|--------------------------|--------|-----------|---------------------------------------|
| KIF2C                    | 11004  | KIF2C     | kinesin family member 2C<br>[Sourc... |
| KIFC1                    | 3833   | KIFC1     | kinesin family member C1<br>[Sourc... |
| KLRA6                    |        |           |                                       |
| KLRA8                    |        |           |                                       |
| KRTAP6-3                 | 337968 | KRTAP6-3  | keratin associated protein 6-3<br>... |
| LBR                      | 3930   | LBR       | lamin B receptor<br>[Source:HGNC S... |
| LEFTY1                   | 10637  | LEFTY1    | left-right determination<br>factor... |
| LIG1                     | 3978   | LIG1      | DNA ligase 1 [Source:HGNC<br>Symbo... |
| LLGL2                    | 3993   | LLGL2     | LLGL scribble cell polarity<br>com... |
| LOC441376                | 441376 | AARD      | alanine and arginine rich<br>domai... |
| LOC665775 /// LO<br>C675 |        |           |                                       |
| LOC671598                |        |           |                                       |
| LOXL2                    | 4017   | LOXL2     | lysyl oxidase like 2<br>[Source:HG... |
| LRRC23                   | 10233  | LRRC23    | leucine rich repeat containing<br>... |
| MAGOH                    | 4116   | MAGOH     | mago homolog, exon junction<br>com... |
| MAP3K7                   | 6885   | MAP3K7    | mitogen-activated protein<br>kinas... |
| MATR3                    | 9782   | MATR3     | matrin 3 [Source:HGNC<br>Symbol;Ac... |
| MBD2                     | 8932   | MBD2      | methyl-CpG binding domain<br>prote... |
| MCM10                    | 55388  | MCM10     | minichromosome maintenance<br>10 r... |
| MCM4                     | 4173   | MCM4      | minichromosome maintenance<br>comp... |
| MCM5                     | 4174   | MCM5      | minichromosome maintenance<br>comp... |
| MCM6                     | 4175   | MCM6      | minichromosome maintenance<br>comp... |
| MDN1                     | 23195  | MDN1      | midasin AAA ATPase 1<br>[Source:HG... |
| METAP1                   | 23173  | METAP1    | methionyl aminopeptidase 1<br>[Sou... |
| MOBK1B                   | 55233  | MOB1A     | MOB kinase activator 1A<br>[Source... |
| MPHOSPH10                | 10199  | MPHOSPH10 | M-phase phosphoprotein 10<br>[Sour... |
| MRPL18                   | 29074  | MRPL18    | mitochondrial ribosomal<br>protein... |
| MUC1                     | 4582   | MUC1      | mucin 1, cell surface<br>associate... |
| MYB                      | 4602   | MYB       | MYB proto-oncogene,<br>transcripti... |
| NARG1                    | 80155  | NAA15     | N-alpha-acetyltransferase 15,<br>N... |

|                     |        |         |                                        |
|---------------------|--------|---------|----------------------------------------|
| NAT12               | 122830 | NAA30   | N-alpha-acetyltransferase 30, N...     |
| NKX2-2              | 4821   | NKX2-2  | NK2 homeobox 2<br>[Source:HGNC Sym...  |
| NOL5A               | 10528  | NOP56   | NOP56 ribonucleoprotein<br>[Source...  |
| NPAS1               | 4861   | NPAS1   | neuronal PAS domain protein 1 [...     |
| NPM1                | 4869   | NPM1    | nucleophosmin 1<br>[Source:HGNC Sy...  |
| NPTX1               | 4884   | NPTX1   | neuronal pentraxin 1<br>[Source:HG...  |
| NR5A2               | 2494   | NR5A2   | nuclear receptor subfamily 5 gr...     |
| NUSAP1              | 51203  | NUSAP1  | nucleolar and spindle associate...     |
| NXF1                | 10482  | NXF1    | nuclear RNA export factor 1<br>[So...  |
| P2RY2               | 5029   | P2RY2   | purinergic receptor P2Y2<br>[Source... |
| PCNT                | 5116   | PCNT    | pericentrin [Source:HGNC Symbol...     |
| PCSK2               | 5126   | PCSK2   | proprotein convertase subtilisi...     |
| PDCD4 /// LOC670861 |        |         |                                        |
| PFDN6               | 10471  | PFDN6   | prefoldin subunit 6<br>[Source:HGN...  |
| PHTF2               | 57157  | PHTF2   | putative homeodomain transcript...     |
| PIK3CA              | 5290   | PIK3CA  | phosphatidylinositol-4,5-bispho...     |
| PLEKHA7             | 144100 | PLEKHA7 | pleckstrin homology domain cont...     |
| PLK2                | 10769  | PLK2    | polo like kinase 2<br>[Source:HGNC...  |
| POLA2               | 23649  | POLA2   | DNA polymerase alpha 2, accesso...     |
| POLRMT              | 5442   | POLRMT  | RNA polymerase mitochondrial [S...     |
| PRC1                | 9055   | PRC1    | protein regulator of cytokinesi...     |
| PSMC3IP             | 29893  | PSMC3IP | PSMC3 interacting protein<br>[Sour...  |
| PSME4               | 23198  | PSME4   | proteasome activator subunit 4 ...     |
| PTPRC               | 5788   | PTPRC   | protein tyrosine phosphatase re...     |
| PTPRCAP             | 5790   | PTPRCAP | protein tyrosine phosphatase re...     |
| PVRL2               | 5819   | NECTIN2 | nectin cell adhesion molecule 2...     |
| RAG2                | 5897   | RAG2    | recombination activating 2<br>[Sou...  |
| RNF12               | 51132  | RLIM    | ring finger protein, LIM domain...     |
| RRM1                | 6240   | RRM1    | ribonucleotide reductase cataly...     |

|          |        |          |                                        |
|----------|--------|----------|----------------------------------------|
| RRM2     | 6241   | RRM2     | ribonucleotide reductase<br>regula...  |
| RSNL2    | 79745  | CLIP4    | CAP-Gly domain containing<br>linke...  |
| RYK      | 6259   | RYK      | receptor like tyrosine kinase<br>[...] |
| SACM1L   | 22908  | SACM1L   | SAC1 like<br>phosphatidylinositide...  |
| SARDH    | 1757   | SARDH    | sarcosine dehydrogenase<br>[Source...  |
| SDC2     | 6383   | SDC2     | syndecan 2 [Source:HGNC<br>Symbol;...  |
| SERPINB9 | 5272   | SERPINB9 | serpin family B member 9<br>[Sourc...  |
| SFRP1    | 6422   | SFRP1    | secreted frizzled related<br>prote...  |
| SFRS1    | 6426   | SRSF1    | serine and arginine rich<br>splici...  |
| SGOL1    | 151648 | SGO1     | shugoshin 1 [Source:HGNC<br>Symbol...  |
| SIX4     | 51804  | SIX4     | SIX homeobox 4<br>[Source:HGNC Sym...  |
| SLC12A1  | 6557   | SLC12A1  | solute carrier family 12<br>member...  |
| SLC23A2  | 9962   | SLC23A2  | solute carrier family 23<br>member...  |
| SLC29A1  | 2030   | SLC29A1  | solute carrier family 29<br>member...  |
| SLC7A6   | 9057   | SLC7A6   | solute carrier family 7 member<br>...  |
| SLTM     | 79811  | SLTM     | SAFB like transcription<br>modulat...  |
| SMC2     | 10592  | SMC2     | structural maintenance of<br>chrom...  |
| SMC4     | 10051  | SMC4     | structural maintenance of<br>chrom...  |
| SOCS2    | 8835   | SOCS2    | suppressor of cytokine<br>signalin...  |
| SPATA5   | 166378 | SPATA5   | spermatogenesis associated 5<br>[S...  |
| SPOP     | 8405   | SPOP     | speckle type BTB/POZ protein<br>[S...  |
| SQRDL    | 58472  | SQOR     | sulfide quinone<br>oxidoreductase ...  |
| SSX2IP   | 117178 | SSX2IP   | SSX family member 2<br>interacting...  |
| STRN3    | 29966  | STRN3    | striatin 3 [Source:HGNC<br>Symbol;...  |
| SYT4     | 6860   | SYT4     | synaptotagmin 4<br>[Source:HGNC Sy...  |
| TARDBP   | 23435  | TARDBP   | TAR DNA binding protein<br>[Source...  |
| TCF1     | 6927   | HNF1A    | HNF1 homeobox A<br>[Source:HGNC Sy...  |
| TEAD3    | 7005   | TEAD3    | TEA domain transcription<br>factor...  |
| THOP1    | 7064   | THOP1    | thimet oligopeptidase 1<br>[Source...  |

|         |        |         |                                        |
|---------|--------|---------|----------------------------------------|
| TK1     | 7083   | TK1     | thymidine kinase 1<br>[Source:HGNC...  |
| TM9SF3  | 56889  | TM9SF3  | transmembrane 9 superfamily<br>mem...  |
| TMOD3   | 29766  | TMOD3   | tropomodulin 3<br>[Source:HGNC Sym...  |
| TNFSF10 | 8743   | TNFSF10 | TNF superfamily member 10<br>[Sour...  |
| TNFSF11 | 8600   | TNFSF11 | TNF superfamily member 11<br>[Sour...  |
| TOP2A   | 7153   | TOP2A   | DNA topoisomerase II alpha<br>[Sou...  |
| TOP2B   | 7155   | TOP2B   | DNA topoisomerase II beta<br>[Sour...  |
| TRAP1A  |        |         |                                        |
| TRIP13  | 9319   | TRIP13  | thyroid hormone receptor<br>intera...  |
| Timm8a1 | 1678   | TIMM8A  | translocase of inner<br>mitochondr...  |
| UFD1L   | 7353   | UFD1    | ubiquitin recognition factor<br>in...  |
| UNG     | 7374   | UNG     | uracil DNA glycosylase<br>[Source:...  |
| USP39   | 10713  | USP39   | ubiquitin specific peptidase<br>39...  |
| USP52   | 9924   | PAN2    | poly(A) specific ribonuclease<br>S...  |
| VPS4B   | 9525   | VPS4B   | vacuolar protein sorting 4<br>homo...  |
| XPO1    | 7514   | XPO1    | exportin 1 [Source:HGNC<br>Symbol;...  |
| YTHDF3  | 253943 | YTHDF3  | YTH N6-methyladenosine<br>RNA bind...  |
| YWHAE   | 7531   | YWHAE   | tyrosine 3-<br>monooxygenase/trypto... |
| ZFP281  |        |         |                                        |
| ZFP644  |        |         |                                        |
| ZFX     | 7543   | ZFX     | zinc finger protein X-linked<br>[S...  |
| ZKSCAN1 | 7586   | ZKSCAN1 | zinc finger with KRAB and<br>SCAN ...  |
| ZMYM6   | 9204   | ZMYM6   | zinc finger MYM-type<br>containing...  |
| ZNF638  | 27332  | ZNF638  | zinc finger protein 638<br>[Source..   |
